# Supplementary material
Source: publisher figshare collection journal article supplement (https://acs.figshare.com/ndownloader/files/3710332)
Supplement: Supplementary file 1 [file 3710332]

# SUPPORTING INFORMATION

The supporting information consists of 63 pages, including cover page, containing 11 figures, 37 tables, and 11 equations.

## Life Cycle Assessment of Biodiesel Produced from Grease Trap Waste

*Megan E. Hums<sup>1</sup>, Richard A. Cairncross<sup>1\*</sup>, & Sabrina Spataro<sup>2</sup>*

<sup>1</sup>Chemical and Biological Chemical Engineering, Drexel University

<sup>2</sup>Civil, Architectural, and Environmental Engineering, Drexel University

Supporting Information (SI)

RESEARCH SCOPE AND METHODS

System Boundary

The system boundary for A) GTW-Biodiesel, B) Current GTW Disposal, C) Soybean-Biodiesel, and D) Low-sulfur diesel are shown in Figure SI-S1. The soybean biodiesel and LSD processes were evaluated using GREET-2014 data<sup>1, 2</sup>.

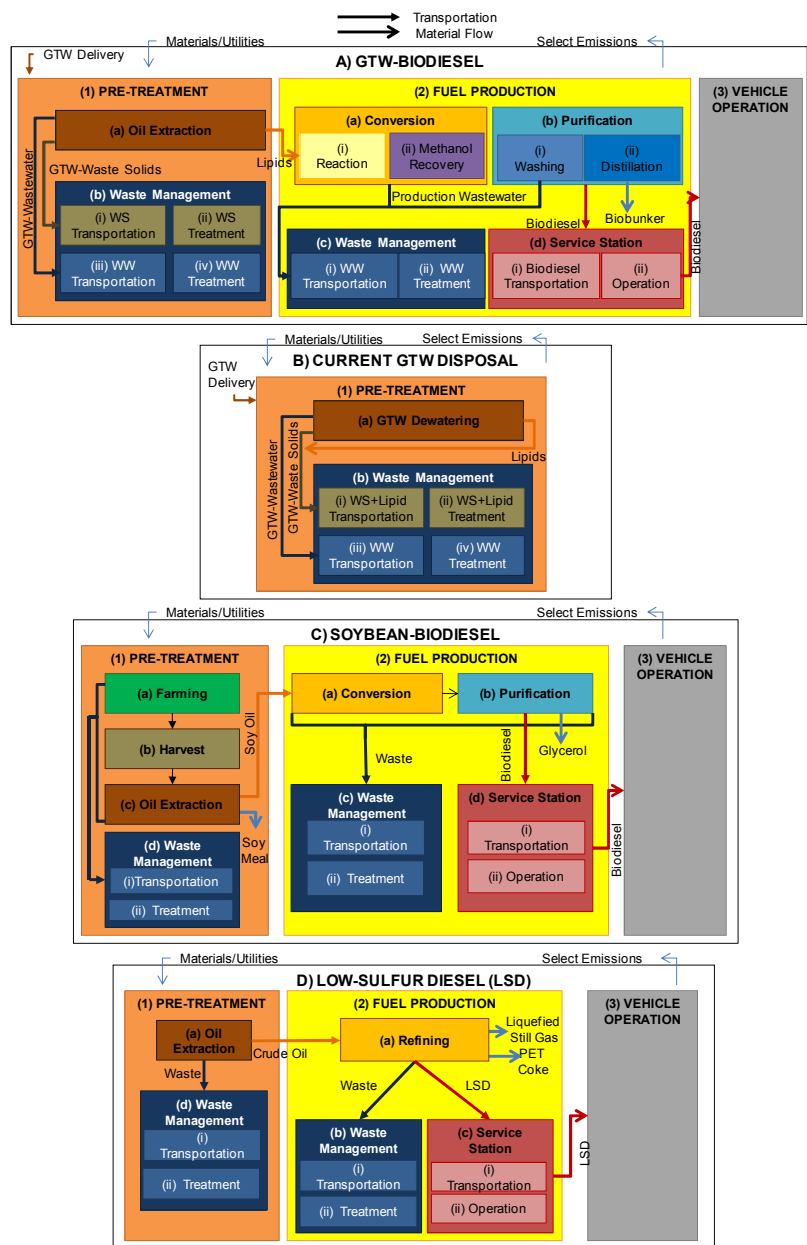

**Figure SI-S1.** System boundary for the production of A) GTW-biodiesel, B) Current GTW Disposal C) Soybean-biodiesel, D) LSD. The boxes indicate process stages; thin arrows

represent transportation; and thick arrows are material flows. Each of the three main stages include the material and energy inputs and emission outputs for (1) Pre-treatment is represented by the orange box, (2) Fuel production is represented by the yellow box, and (3) Vehicle operation is represented by the gray box. Some process stages have a sub-stage marked with letters a-d and some sub-stages have individual steps marked i-iv.

For the soybean-biodiesel process, the pre-treatment included planting and harvesting of soybeans, soybean oil extraction, and transportation and treatment of waste. The fuel production stage included four sub-stages: conversion, purification, waste management, and the service station. Co-product soybean meal and glycerol were treated as mass and market allocations, respectively<sup>1</sup>. The final stage was vehicle operation.

For LSD, the pre-treatment included oil extraction and transportation and treatment of waste. The fuel production stage included three sub-stages: refining of LSD, waste management, and service station. The final stage was vehicle operation. In the model LSD, by-products such as liquefied still gas and petroleum (PET) coke were treated as internal products<sup>2</sup>.

## **GTW-Biodiesel Process Description**

### ***GTW Transportation to Transfer Station***

The average distance of the collection route was 286 based on data collected from a grease hauler during a longitudinal study<sup>3</sup>. Table SI-S1 shows the 13 different routes that were used to determine the average distance.

**Table SI-S1.** Transportation of GTW to transfer station

| Sampling Date | Route, km |
|---------------|-----------|
| 6/26/2014     | 140       |
| 7/3/2014      | 170       |
| 7/15/2014     | 192       |
| 7/25/2014     | 144       |

|           |     |
|-----------|-----|
| 8/11/2014 | 364 |
| 12/8/2014 | 157 |
| 1/8/2015  | 272 |
| 2/3/2015  | 518 |
| 2/19/2015 | 223 |
| 3/10/2015 | 234 |
| 4/8/2015  | 407 |
| 4/17/2015 | 320 |
| 4/27/2015 | 373 |
| 5/11/2015 | 344 |
| 6/2/2015  | 459 |
| 6/23/2015 | 266 |
| Average   | 286 |

38 The environmental impacts were determined using transportation emissions data in SimaPro8.

### 39 ***Process Flow Diagram***

40 The process flow diagram (Figure SI-S2) shows the production of biodiesel from GTW  
41 including separation of lipids, reaction of lipids, methanol recovery, washing of crude FAME,  
42 and purification to ASTM grade biodiesel. The process model was developed using material and  
43 energy balances, process heuristics, and design projects.

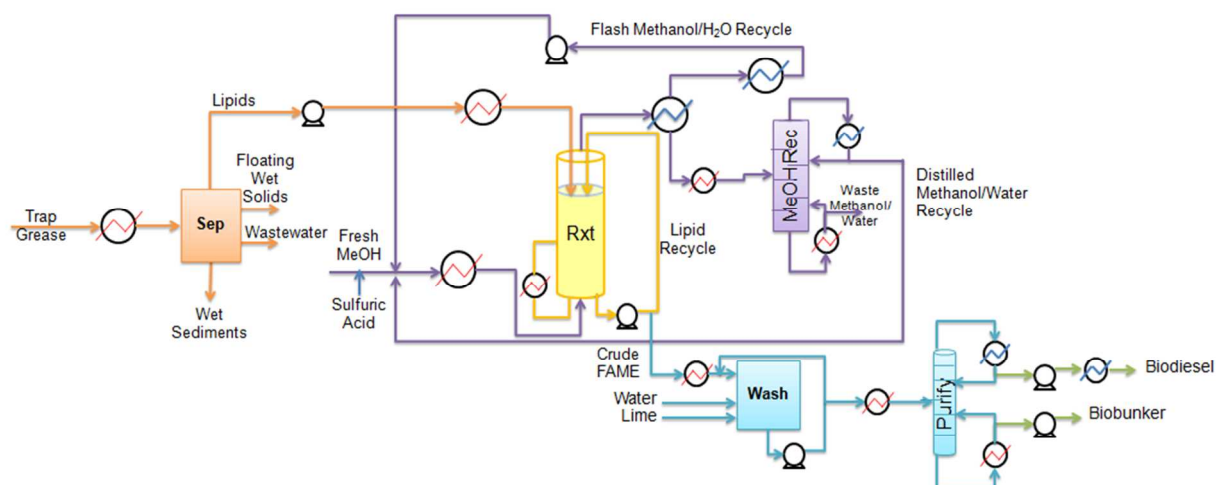

44

**Figure SI-S2.** Process flow diagram for the GTW-biodiesel production process. Process stages are represented: pre-treatment lipid separation (orange), biodiesel reaction (yellow), methanol recovery (purple), and washing/purification (blue).

### ***Pre-treatment***

#### ***Oil Extraction***

The separation step extracted the brown grease lipids from the rest of the trap waste. The volumetric balance of the trap grease lipids was varied from 2% to 40% by volume. The floating solids and sediments were kept constant at 10% and 25%, respectively. The wastewater was the remaining portion of the overall grease trap waste. The lipids contained 97% FFA which was represented using oleic acid. Oleic acid (C18:1) is typically the highest percentage of substance present in the analysis of grease lipids. The GTW was heated to 60 °C for three hours with a heat loss of 50%. Process steam from the combustion of natural gas was used to heat the separator and electricity was used for a pump and vibrating screen.

#### ***Pre-treatment Waste Management***

This section describes the method to determine GWP<sub>100</sub> for emissions associated with flaring and co-generation of landfill gas. A diagram of landfill gas emissions and collection is shown in Figure SI-S3.

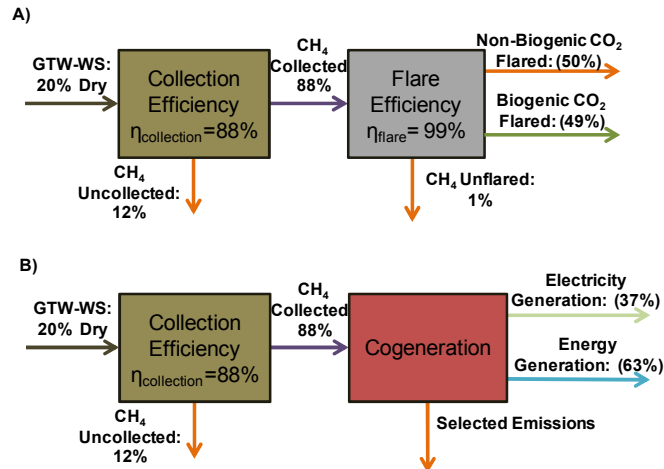

**Figure SI-S3.** Landfill emissions mass flow diagram for treatment of landfill gas by A) Flaring and B) Co-generation to produce electricity and heat.

GTW-WS were wet when separated; a moisture content of 80% was assumed based off laboratory tests to determine the dry mass. The waste in the landfill emits methane gas which assumed an average collection rate of 88%<sup>4</sup>. The flare landfill gas scenario included flaring with an efficiency of 99%<sup>4</sup>. Because 51% of the carbon content of food waste was biogenic<sup>4</sup>, 51% of the carbon dioxide that was emitted through flaring did not contribute to the GWP<sub>100</sub>. The co-generation scenario included the impacts of uncollected methane gas and the impacts associated with the co-generation. The co-generation was modeled from the Ecoinvent database for bioenergy<sup>5</sup> with an assumption of heat generation of 0.55 MJ/MJin and electricity generation of 0.32 MJ/MJin where MJin is the energy of the landfill gas that was collected. The electricity and heat produced from co-generation were treated as avoided products where the GWP<sub>100</sub> associated with electricity and the energy of natural gas for steam production were treated as a negative value.

The landfill emissions were determined by a mass balance on the degradation food waste. The total amount of carbon dioxide equivalents emitted to the atmosphere through flaring of landfill gas is calculated using the following mass balance:

$$\frac{gCO_2eq}{MJ-fuel} = \{[300.7 * 0.2 * m_{GTW-WS,wet} * (1 - \eta_{collection})] + [300.7 * 0.2 * m_{GTW-WS,wet} * \eta_{collection} * (1 - \eta_{flare})]\} * 25 * \rho_{CH_4} + [(300.7 * 0.2 * m_{GTW-WS,wet} * \eta_{collection} * \eta_{flare}) * \rho_{CH_4}] * \frac{44}{16} * \%_{NonbiogenicCO_2} \quad (SI-S1)$$

Where,

300.7 = methane yield for food waste (mL CH<sub>4</sub>/g dry mass)<sup>6</sup>

0.2 = dry fraction of GTW-WS (80% moisture content based on lab tests)

$m_{GTW-WS,wet}$  = GTW-WS wet mass per MJ-fuel

25 = 100-year global warming potential of methane (g CO<sub>2</sub>-eq)

$\rho_{CH_4}$  = methane density = 0.66 g/L

44/16 = ratio of molecular weights of carbon dioxide to methane

$\%_{NonbiogenicCO_2}$  = percentage of non-biogenic carbon dioxide

$\eta_i$  = efficiency at stage i: (1) methane collection = 88%<sup>4</sup> (2) methane flare = 99%

The simplified GWP<sub>100</sub> for the co-generation of landfill gas can be represented by equation SI-S2:

$$\frac{gCO_2eq}{MJ-fuel} = [CH_4_{uncollected}] + \{[CogenerationGWP_{100} + LubricantGWP_{100}]\} - \{[AvoidedGWP_{100}]\} \quad (SI-S2)$$

The GWP<sub>100</sub> is determined by summing the GWP<sub>100</sub> of the uncollected methane, the GWP<sub>100</sub> for the lubricant use and disposal in co-generation and subtracting the impacts associated with the electricity and natural gas that are avoided because of the co-generation. The values for lubricant, co-generation greenhouse gases, electricity, and heat are defined by the life cycle inventory for bioenergy data as “per MJ” of methane gas into the process (Table SI-S2); therefore, these impacts need to be multiplied by the energy of methane gas collected.

The uncollected methane gas GWP<sub>100</sub> is determined using the following equation:

$$CH_4_{uncollected} = \frac{gCO_2eq}{MJ-fuel} = [300.7 * 0.2 * m_{GTW-WS,wet} * (1 - \eta_{collection})] * 25 * \rho_{CH_4} \quad (SI-S3)$$

The amount of landfill gas produced for the co-generation emissions were determined by truncating Equation SI-S1 before the flaring emissions and converting to energy using the lower heating value of 0.0359 MJ/L:

$$E_{\text{CH}_4 \text{ collected}} = \frac{E_{\text{CH}_4}}{\text{MJ-fuel}} = \{[300.7 * 0.2 * m_{\text{GTW-WS,wet}} * (\eta_{\text{collection}})]\} * 0.0359 \quad (\text{SI-S4})$$

The greenhouse gases associated with GWP<sub>100</sub> and materials used for co-generation were determined using Table 13.12 in the life cycle inventories of bioenergy data<sup>5</sup> summarized below:

**Table SI-S2.** Summary of co-generation inventory based off of 1 MJ of energy in (landfill gas energy)

| Item                  | Unit    | Value    |
|-----------------------|---------|----------|
| Generated Electricity | MJ/MJin | 0.32     |
| Generated Heat        | MJ/MJin | 0.55     |
| Lubricating Oil       | kg/MJin | 3.00E-05 |
| Disposal Mineral Oil  | kg/MJin | 3.00E-05 |
| CH <sub>4</sub>       | kg/MJin | 2.30E-05 |
| N <sub>2</sub> O      | kg/MJin | 2.50E-06 |

The GWP<sub>100</sub> impacts associated with 1 kg of lubricant consumption and disposal is found in Table SI-S3. This table also includes the GWP<sub>100</sub> of producing 1 MJ of electricity and 1 MJ of natural gas that are avoided depending on the amount of electricity and heat that is generated from the landfill gas. The lubricating oil and electricity impacts were determined using SimaPro<sup>7</sup> while the natural gas impact was determined in GREET2014<sup>8</sup>.

**Table SI-S3.** Environmental impacts associated with processing and avoided impacts in co-generation.

|                    |                       | Processing Impacts                |                                        | Avoided Impacts               |                               |
|--------------------|-----------------------|-----------------------------------|----------------------------------------|-------------------------------|-------------------------------|
|                    | Unit                  | 1 kg Lubricating Oil <sup>7</sup> | 1 kg Disposal Mineral Oil <sup>7</sup> | 1 MJ Electricity <sup>7</sup> | 1 MJ Natural Gas <sup>8</sup> |
| GWP <sub>100</sub> | g CO <sub>2</sub> -eq | 886                               | 2850                                   | 201                           | 86                            |



The GWP<sub>100</sub> for the co-generation greenhouse gases were determined using the following equation:

$$\text{CogenerationGWP}_{100} = \frac{gCO_2eq}{MJ-fuel} = [E_{CH_4} \text{collected}] * \{[CH_4 * 25 + N_2O * 298] * 1000\} \text{ (SI-S5)}$$

The GWP<sub>100</sub> associated with the lubricant were determined by multiplying the energy collected (equation SI-S4) by the amount of lubricating oil (table SI-S2) and GWP<sub>100</sub> of lubricating oil (table SI-S3):

$$\begin{aligned} \text{LubricantGWP}_{100} &= [E_{CH_4} \text{collected}] \\ &* \{[\text{LubricatingOil} * \text{GWP}_{100} \text{LubricatingOil}] \\ &+ [\text{DisposalMineralOil} * \text{GWP}_{100} \text{DisposalMineralOil}]\} \text{ (SI - S6)} \end{aligned}$$

The avoided emissions were calculated using equation SI-S7:

$$\begin{aligned} \text{AvoidedGWP}_{100} &= [E_{CH_4} \text{collected}] \\ &* \{[\text{GeneratedElectricity} * \text{GWP}_{100} \text{Electricity}] \\ &+ [\text{GeneratedHeat} * \text{GWP}_{100} \text{NaturalGas}]\} \text{ (SI - S7)} \end{aligned}$$

Combining equations SI-S3 to SI-S7 and substituting into SI-S2 gives equation SI-S8 for the total GWP<sub>100</sub> of landfill gas co-generation:

$$\begin{aligned} \text{TotalGWP}_{100} = \frac{gCO_2eq}{MJ-fuel} &= [300.7 * 0.2 * m_{GTW-WS,wet} * (1 - \eta_{collection})] * 25 * \rho_{CH_4} + \\ &\{[300.7 * 0.2 * m_{GTW-WS,wet} * (\eta_{collection})]\} * 0.0359 * \{[CH_4 * 25 + N_2O * 298] * 1000\} + \\ &\{[\text{LubricatingOil} * \text{GWP}_{100} \text{LubricatingOil}] + \\ &[\text{DisposalMineralOil} * \text{GWP}_{100} \text{DisposalMineralOil}]\} - \\ &\{[\text{GeneratedElectricity} * \text{GWP}_{100} \text{Electricity}] + [\text{GeneratedHeat} * \text{GWP}_{100} \text{NaturalGas}]\} \text{ (SI-S8)} \end{aligned}$$

### **Fuel Production**

#### *Conversion*

The model uses a bubble column reactor that has been developed by researchers at Drexel University. This work was inspired by experiments done by Kocsisová et al. on the esterification of FFA at ambient pressure and high temperature (50-60 °C higher than the boiling point of methanol)<sup>9</sup>. The bubble column is effective at converting high-FFA lipid sources into FAME and the esterification of lipid at any FFA/TAG ratio<sup>10</sup>. The column is also robust at converting

the FFA with a mixture of 80% methanol and 20% water which is beneficial when using recycled methanol<sup>10</sup>.

The model uses the same conditions at which experimental data was collected with the bubble column reactor. The reactor was run at 125 °C for 3 hours with a heat loss of 50%. Fresh methanol and catalyst were also heated and pumped into the reactor. Another pump was used to re-circulate the oil. Pumping efficiencies were 60%. Process steam and cooling water were used for the reaction and electricity was used for the pumping.

#### *Methanol Recovery*

Methanol was recovered using a flash condenser and distillation column. The distillation column had a reflux ratio of 1.5 and a reboil ratio of 2 assuming pure methanol and water, respectively. A fractional recovery of water in the distillate was estimated to be 16.1%. Methanol was recovered 85% by mole in distillate during fractional distillation and 99% of methanol was recovered in the distillate of the distillation column. Natural gas combusted for process steam, cooling water, and electricity were used for heating/cooling and for powering pumps.

#### *Purification*

The crude biodiesel was first neutralized with sodium hydroxide, washed with water, and dried at 80 °C. A short-path evaporator was then used for further purification. Short-path evaporation operates similarly to a distillation column; however, it operates under vacuum to lower the boiling point of the crude material. The evaporator was run at 0.1 bar and 260 °C. Process steam, cooling water, and electricity were used for the heating/cooling and for pumping. The model has a rough estimate of conditions for the short-path evaporator and more research is being performed to optimize the conditions for purifying biodiesel.

## 168 Life Cycle Inventory

169 The material and energy balances based on the process flow diagram, heuristics, and design  
 170 projects were used to calculate a process inventory.

171 **Table SI-S4.** Life cycle inventory by component and database used in the LCA

|                                                | Name in Database                                                        | Database               | Program     |
|------------------------------------------------|-------------------------------------------------------------------------|------------------------|-------------|
| <b>INPUTS</b>                                  |                                                                         |                        |             |
| <b>Materials</b>                               |                                                                         |                        |             |
| Sulfuric acid                                  | Sulphuric acid, liquid,<br>at plant/RER U                               | Ecoinvent              | SimaPro8    |
| Methanol                                       | Methanol, at regional<br>storage/CH U                                   | Ecoinvent              | SimaPro8    |
| Wash water                                     | Water, deionised, at<br>plant/CH U                                      | Ecoinvent              | SimaPro8    |
| Sodium hydroxide                               | Sodium hydroxide,<br>production mix, at<br>plant/kg/RNA                 | USLCI                  | SimaPro8    |
| <b>Utilities</b>                               |                                                                         |                        |             |
| Natural gas for<br>steam production            |                                                                         |                        | REET2014    |
| Electricity                                    | Electricity, medium<br>voltage, at grid/US U                            | Ecoinvent              | SimaPro8    |
| Cooling water                                  | Water, decarbonised,<br>at plant/RER U                                  | Ecoinvent              | SimaPro8    |
| <b>OUTPUTS</b>                                 |                                                                         |                        |             |
| <b>Materials</b>                               |                                                                         |                        |             |
| Production<br>wastewater                       | Waste water –<br>untreated, slightly<br>organic contaminated<br>EU-27 S | ELCD                   | SimaPro8    |
| GTW wastewater                                 | Waste water –<br>untreated, EU-27 S                                     | ELCD                   | SimaPro8    |
| GTW waste solids:<br>methane gas<br>production | Food Waste                                                              | Landfill<br>Literature | Calculation |
| GTW waste solids:<br>co-generation             |                                                                         | EcoInvent              | Calculation |
| <b>Transportation</b>                          |                                                                         |                        |             |

|                          |                                               |           |          |
|--------------------------|-----------------------------------------------|-----------|----------|
| Biodiesel                | Transport, lorry >16t,<br>fleet average/RER U | EcoInvent | SimaPro8 |
| Production<br>wastewater | Transport, lorry >16t,<br>fleet average/RER U | EcoInvent | SimaPro8 |
| GTW wastewater           | Transport, lorry >16t,<br>fleet average/RER U | EcoInvent | SimaPro8 |
| GTW waste solids         | Transport, lorry >16t,<br>fleet average/RER U | EcoInvent | SimaPro8 |

172

173 The full inventory for 2-40% lipid content is shown in Table SI-S5. Most of the materials and  
 174 utilities are independent of lipid content with the exception of rows 5, 15, 17, 19, 21 which are  
 175 part of the pre-treatment process.

176 **Table SI-S5.** Life Cycle Inventory for GTW-biodiesel production with lipid contents of 2-40%

|                                | <b>Lipid Content</b>                                 | <b>2%</b> | <b>3%</b> | <b>4%</b> | <b>5%</b> | <b>7%</b> | <b>10%</b> | <b>20%</b> | <b>30%</b> | <b>40%</b> |
|--------------------------------|------------------------------------------------------|-----------|-----------|-----------|-----------|-----------|------------|------------|------------|------------|
| <b>INPUTS/MJ<br/>biodiesel</b> |                                                      |           |           |           |           |           |            |            |            |            |
| <b>Materials</b>               |                                                      |           |           |           |           |           |            |            |            |            |
| 1                              | Sulfuric acid, kg [a]                                | 0.0001    | 0.0001    | 0.0001    | 0.0001    | 0.0001    | 0.0001     | 0.0001     | 0.0001     | 0.0001     |
| 2                              | Methanol, kg [a]                                     | 0.0029    | 0.0029    | 0.0029    | 0.0029    | 0.0029    | 0.0029     | 0.0029     | 0.0029     | 0.0029     |
| 3                              | Wash water, kg [a]                                   | 0.0295    | 0.0295    | 0.0295    | 0.0295    | 0.0295    | 0.0295     | 0.0295     | 0.0295     | 0.0295     |
| 4                              | Sodium hydroxide, kg [a]                             | 0.0001    | 0.0001    | 0.0001    | 0.0001    | 0.0001    | 0.0001     | 0.0001     | 0.0001     | 0.0001     |
| <b>Utilities</b>               |                                                      |           |           |           |           |           |            |            |            |            |
| <b>Oil Extraction</b>          |                                                      |           |           |           |           |           |            |            |            |            |
| 5                              | Natural gas for steam production, m <sup>3</sup> [b] | 0.0115    | 0.0076    | 0.0057    | 0.0045    | 0.0032    | 0.0022     | 0.0011     | 0.0007     | 0.0005     |
| 6                              | Electricity, kWh [a]                                 | 0.0002    | 0.0002    | 0.0002    | 0.0002    | 0.0002    | 0.0002     | 0.0002     | 0.0002     | 0.0002     |
| <b>Conversion</b>              |                                                      |           |           |           |           |           |            |            |            |            |
| 7                              | Natural gas for steam production, m <sup>3</sup> [b] | 0.0020    | 0.0020    | 0.0020    | 0.0020    | 0.0020    | 0.0020     | 0.0020     | 0.0020     | 0.0020     |
| 8                              | Electricity, kWh [a]                                 | <0.0001   | <0.0001   | <0.0001   | <0.0001   | <0.0001   | <0.0001    | <0.0001    | <0.0001    | <0.0001    |
| 9                              | Cooling water, kg [a]                                | 0.7255    | 0.7255    | 0.7255    | 0.7255    | 0.7255    | 0.7255     | 0.7255     | 0.7255     | 0.7255     |
| <b>Purification</b>            |                                                      |           |           |           |           |           |            |            |            |            |

|    |                                                      |         |         |         |         |         |         |         |         |         |
|----|------------------------------------------------------|---------|---------|---------|---------|---------|---------|---------|---------|---------|
| 10 | Natural gas for steam production, m <sup>3</sup> [b] | 0.0017  | 0.0017  | 0.0017  | 0.0017  | 0.0017  | 0.0017  | 0.0017  | 0.0017  | 0.0017  |
| 11 | Electricity, kWh [a]                                 | <0.0001 | <0.0001 | <0.0001 | <0.0001 | <0.0001 | <0.0001 | <0.0001 | <0.0001 | <0.0001 |
| 12 | Cooling water, kg [a]                                | 0.9982  | 0.9982  | 0.9982  | 0.9982  | 0.9982  | 0.9982  | 0.9982  | 0.9982  | 0.9982  |

## OUTPUTS/MJ

### Biodiesel

#### Materials

|    |                               |        |        |        |        |        |        |        |        |        |
|----|-------------------------------|--------|--------|--------|--------|--------|--------|--------|--------|--------|
| 13 | GTW biodiesel, kg             | 0.0265 | 0.0265 | 0.0265 | 0.0265 | 0.0265 | 0.0265 | 0.0265 | 0.0265 | 0.0265 |
| 14 | Biobunker, kg                 | 0.0005 | 0.0005 | 0.0005 | 0.0005 | 0.0005 | 0.0005 | 0.0005 | 0.0005 | 0.0005 |
| 15 | GTW wastewater, kg [a]        | 0.9084 | 0.5960 | 0.4398 | 0.3460 | 0.2389 | 0.1586 | 0.0649 | 0.0336 | 0.0180 |
| 16 | Production wastewater, kg [a] | 0.0323 | 0.0323 | 0.0323 | 0.0323 | 0.0323 | 0.0323 | 0.0323 | 0.0323 | 0.0323 |
| 17 | GTW waste solids, kg [c]      | 0.5046 | 0.3364 | 0.2523 | 0.2019 | 0.1442 | 0.1009 | 0.0505 | 0.0336 | 0.0252 |

#### Transportation

|    |                                 |        |        |        |        |        |        |        |        |        |
|----|---------------------------------|--------|--------|--------|--------|--------|--------|--------|--------|--------|
| 18 | Biodiesel, tkm* [a]             | 0.0026 | 0.0026 | 0.0026 | 0.0026 | 0.0026 | 0.0026 | 0.0026 | 0.0026 | 0.0026 |
| 19 | GTW wastewater, tkm* [a]        | 0.0454 | 0.0298 | 0.0220 | 0.0173 | 0.0119 | 0.0079 | 0.0032 | 0.0017 | 0.0009 |
| 20 | Production wastewater, tkm* [a] | 0.0016 | 0.0016 | 0.0016 | 0.0016 | 0.0016 | 0.0016 | 0.0016 | 0.0016 | 0.0016 |
| 21 | GTW waste solids, tkm* [a]      | 0.0252 | 0.0168 | 0.0126 | 0.0101 | 0.0072 | 0.0050 | 0.0025 | 0.0017 | 0.0013 |

177 \*metric ton times kilometers traveled

178 [a] SimaPro<sup>8</sup>

179 [b] GREET2014<sup>11</sup>

180 [c] Landfill Literature<sup>4, 6</sup>/EcoInvent database<sup>5</sup>

181 To produce 1 MJ of biodiesel, the amount of GTW entering the process increases as lipid  
182 content decreases; unlike the constant GTW input studied by Tu and McDonnell where biodiesel  
183 production was varied. In this scenario, many of the inputs do not change with lipid content  
184 because they are proportional to the amount of biodiesel produced. When lipid content  
185 decreases, the pre-treatment requires more energy and produces more GTW-WW and GTW-WS  
186 that need to be transported and treated for disposal.

## 187 Uncertainty/Model Fitting

A model was developed to analyze and test trends in the environmental impacts of producing biodiesel from GTW with varying lipid contents. The total impact normalized by the amount of biodiesel produced is expressed as a sum of the flowrates into each stage (Figure SI-S1-A) multiplied by the impact intensity from each of the process stages in Equation SI-S9:

$$\frac{I_{Total}}{E_{Biodiesel}} = \frac{\dot{M}_{GTW}\hat{I}_{PT} + \dot{M}_{Lipids}\hat{I}_{FP} + \dot{M}_{Biodiesel}\hat{I}_{VO}}{\dot{M}_{Biodiesel}\Delta\hat{H}_C} \quad (\text{SI-S9})$$

Where,

$\hat{I}_i$  = environmental impact intensity of process stage i per unit mass of input (PT = pre-treatment, FP = fuel production, and VO = vehicle operation: combustion emissions)

$\dot{M}_j$  = mass flowrate of j entering into the process stage

$\Delta\hat{H}_C$  = heat of combustion of biodiesel (lower heating value)

$E_{Biodiesel}$  = energy content of biodiesel produced

The impact intensity factors  $\hat{I}_i$  approximate the environmental impacts per unit of feedstock entering each stage (GTW enters the pre-treatment stage, GTW lipids enter fuel production stage, and biodiesel enters the vehicle operation stage). The relationship between the feedstock flowrates can be estimated using the lipid content of GTW as  $x$  and the yield of the fuel production process as  $\phi$ :

$$\dot{M}_{Biodiesel} = \phi\dot{M}_{Lipids} = \phi x\dot{M}_{GTW} \quad (\text{SI-S10})$$

Combining Equations 2 and 3 produces a relationship between the total impacts and GTW lipid content that is useful for analyzing the LCA results shown in Equation SI-S11.

$$\frac{I_{Total}}{E_{Biodiesel}} = \left(\frac{\hat{I}_{PT}}{\phi\Delta\hat{H}_C}\right)\frac{1}{x} + \left(\frac{\hat{I}_{FP}}{\phi\Delta\hat{H}_C} + \frac{\hat{I}_{VO}}{\Delta\hat{H}_C}\right) \quad (\text{SI-S11})$$

Equation SI-S11 predicts that the total environmental impacts are proportional to the reciprocal of the GTW lipid content,  $1/x$ . The reciprocal of the lipid content is a measure of the amount of GTW that must be processed to produce a given amount of biodiesel. In the LCA model, more

lipid contents were used in the low-range lipid contents (2%, 3%, 4%, and 5%) to best represent the hyperbolic rise. Linear regression of Equation SI-S11 to the theoretical environmental impacts versus  $1/x$  was used to estimate slope and intercept.

For the model fitting, the lipid content by volume was inverted to get  $1/x$ . Multiplying by the density of the GTW (1.1 kg/L) the lipid content gives the lipid content by mass.

## RESULTS AND DISCUSSION

### 100-year Global Warming Potential Consequential LCA

The table below lists the data for the  $GWP_{100}$  for the consequential analysis in Figure 2 of the article.

**Table SI-S6.**  $GWP_{100}$  Consequential LCA for Flare Scenario. The colored cells indicate the corresponding bars in Figure 2.

| Lipid Content                                           | 2%         | 3%         | 4%         | 5%         | 7%         | 10%        | 20%        | 30%        | 40%        |
|---------------------------------------------------------|------------|------------|------------|------------|------------|------------|------------|------------|------------|
| <b>Proposed GTW-Biodiesel Process</b>                   |            |            |            |            |            |            |            |            |            |
| Delivery to Transfer Station                            | 44         | 29         | 22         | 18         | 13         | 9          | 4          | 3          | 2          |
| Pre-treatment WM                                        | 131        | 87         | 65         | 52         | 37         | 25         | 12         | 8          | 6          |
| GTW-Biodiesel Rest of Process                           | 50         | 40         | 35         | 31         | 28         | 25         | 22         | 21         | 20         |
| <b>Total GTW-Biodiesel Process</b>                      | <b>226</b> | <b>156</b> | <b>122</b> | <b>101</b> | <b>77</b>  | <b>59</b>  | <b>39</b>  | <b>32</b>  | <b>28</b>  |
| <b>Current GTW Process</b>                              |            |            |            |            |            |            |            |            |            |
| Delivery to Transfer Station                            | 44         | 29         | 22         | 18         | 13         | 9          | 4          | 3          | 2          |
| Current GTW Disposal                                    | 139        | 95         | 73         | 60         | 45         | 33         | 20         | 16         | 13         |
| Low Sulfur Diesel                                       | 93         | 93         | 93         | 93         | 93         | 93         | 93         | 93         | 93         |
| <b>Total Displaced Current GTW Process</b>              | <b>276</b> | <b>217</b> | <b>188</b> | <b>170</b> | <b>150</b> | <b>135</b> | <b>117</b> | <b>111</b> | <b>108</b> |
| <b>Total GTW-Biodiesel - Total Current GTW Disposal</b> | <b>-50</b> | <b>-61</b> | <b>-66</b> | <b>-69</b> | <b>-73</b> | <b>-75</b> | <b>-78</b> | <b>-80</b> | <b>-80</b> |

225 **Table SI-S7.** GWP<sub>100</sub> Consequential LCA for Co-Generation Scenario

| Lipid Content                                           | 2%         | 3%         | 4%         | 5%         | 7%         | 10%        | 20%        | 30%        | 40%        |
|---------------------------------------------------------|------------|------------|------------|------------|------------|------------|------------|------------|------------|
| <b>Proposed GTW-Biodiesel Process</b>                   |            |            |            |            |            |            |            |            |            |
| Delivery to Transfer Station                            | 44         | 29         | 22         | 18         | 13         | 9          | 4          | 3          | 2          |
| Pre-treatment WM                                        | 175        | 116        | 87         | 69         | 49         | 34         | 17         | 11         | 8          |
| Biodiesel Co-Gen Avoided Utilities                      | -107       | -71        | -54        | -43        | -31        | -21        | -11        | -7         | -5         |
| GTW-Biodiesel Rest of Process                           | 50         | 40         | 35         | 31         | 28         | 25         | 22         | 21         | 20         |
| <b>Total GTW-Biodiesel Process</b>                      | <b>162</b> | <b>114</b> | <b>90</b>  | <b>76</b>  | <b>59</b>  | <b>47</b>  | <b>32</b>  | <b>27</b>  | <b>25</b>  |
| <b>Current GTW Process</b>                              |            |            |            |            |            |            |            |            |            |
| Delivery to Transfer Station                            | 44         | 29         | 22         | 18         | 13         | 9          | 4          | 3          | 2          |
| Current GTW Disposal                                    | 185        | 126        | 97         | 79         | 59         | 44         | 26         | 21         | 18         |
| Current GTW Co-Gen Avoided Utilities                    | -112       | -77        | -59        | -48        | -36        | -27        | -16        | -13        | -11        |
| Low Sulfur Diesel                                       | 93         | 93         | 93         | 93         | 93         | 93         | 93         | 93         | 93         |
| <b>Total Displaced Current GTW Process</b>              | <b>209</b> | <b>171</b> | <b>153</b> | <b>141</b> | <b>128</b> | <b>119</b> | <b>107</b> | <b>104</b> | <b>102</b> |
| <b>Total GTW-Biodiesel - Total Current GTW Disposal</b> | <b>-47</b> | <b>-57</b> | <b>-63</b> | <b>-66</b> | <b>-69</b> | <b>-72</b> | <b>-75</b> | <b>-76</b> | <b>-77</b> |

226

227 **Attributional LCA**

228 The two tables below represent are the results of GREET2014 for soybean-biodiesel and LSD.

229 **Table SI-S8.** Soybean biodiesel data

|                               | GWP <sub>100</sub>            | CED <sub>Fossil</sub> | Carbon Monoxide | Particulate Matter | Mono-nitrogen Oxides       | Sulfur Oxides              |
|-------------------------------|-------------------------------|-----------------------|-----------------|--------------------|----------------------------|----------------------------|
| Unit                          | g-CO <sub>2</sub> -eq/MJ-fuel | MJ/MJ-fuel            | g-CO/MJ-fuel    | g-PM/MJ-fuel       | g-NO <sub>x</sub> /MJ-fuel | g-SO <sub>x</sub> /MJ-fuel |
| <b>Soybean Production</b>     | 5.663                         | 0.049                 | 0.010           | 0.002              | 0.018                      | 0.017                      |
| <b>Soy Oil Extraction</b>     | 4.241                         | 0.056                 | 0.003           | 0.001              | 0.006                      | 0.010                      |
| <b>Soy oil Transportation</b> | 0.721                         | 0.009                 | 0.002           | 0.000              | 0.007                      | 0.001                      |
| <b>Pre-Treatment</b>          | <b>10.625</b>                 | <b>0.113</b>          | <b>0.014</b>    | <b>0.003</b>       | <b>0.032</b>               | <b>0.028</b>               |



|                                 |               |              |              |              |              |              |
|---------------------------------|---------------|--------------|--------------|--------------|--------------|--------------|
| <b>Total</b>                    |               |              |              |              |              |              |
| <b>Soy oil Conversion</b>       | 9.117         | 0.138        | 0.004        | 0.001        | 0.008        | 0.008        |
| <b>Biodiesel Transportation</b> | 0.510         | 0.006        | 0.001        | 0.000        | 0.004        | 0.001        |
| <b>Biodiesel Storage</b>        | 0.000         | 0.000        | 0.000        | 0.000        | 0.000        | 0.000        |
| <b>Fuel Production Total</b>    | <b>9.627</b>  | <b>0.144</b> | <b>0.004</b> | <b>0.002</b> | <b>0.011</b> | <b>0.009</b> |
| <b>Vehicle Operation</b>        | 4.794         | 0.000        | 0.066        | 0.001        | 0.037        | 0.000        |
| <b>Total</b>                    | <b>25.046</b> | <b>0.257</b> | <b>0.085</b> | <b>0.006</b> | <b>0.080</b> | <b>0.037</b> |

**Table SI-S9. LSD data**

|                                              | GWP <sub>100</sub><br>g-CO <sub>2</sub> -<br>eq/MJ-<br>fuel | CED <sub>Fossil</sub><br>MJ/MJ-<br>fuel | Carbon<br>Monoxide<br>g-CO/MJ-<br>fuel | Particulate<br>Matter<br>g-PM/MJ-<br>fuel | Mono-<br>nitrogen<br>Oxides<br>g-<br>NOx/MJ<br>-fuel | Sulfur<br>Oxides<br>g-<br>SOx/MJ<br>-fuel |
|----------------------------------------------|-------------------------------------------------------------|-----------------------------------------|----------------------------------------|-------------------------------------------|------------------------------------------------------|-------------------------------------------|
| Heavy Butane from Crude Oil                  | 0.001                                                       | 0.000                                   | 0.000                                  | 0.000                                     | 0.000                                                | 0.000                                     |
| Crude Recovery for U.S. Refineries           | 8.744                                                       | 0.079                                   | 0.008                                  | 0.002                                     | 0.025                                                | 0.013                                     |
| <b>Well/Pre-treatment Total</b>              | <b>8.744</b>                                                | <b>0.079</b>                            | <b>0.008</b>                           | <b>0.002</b>                              | <b>0.025</b>                                         | <b>0.013</b>                              |
| LSD Refining                                 | 7.890                                                       | 0.123                                   | 0.005                                  | 0.002                                     | 0.010                                                | 0.008                                     |
| Processing LSD                               | 0.463                                                       | 0.005                                   | 0.001                                  | 0.000                                     | 0.003                                                | 0.001                                     |
| LSD Storage                                  | 0.000                                                       | 0.000                                   | 0.000                                  | 0.000                                     | 0.000                                                | 0.000                                     |
| <b>Fuel Production/<br/>Processing Total</b> | <b>8.353</b>                                                | <b>0.128</b>                            | <b>0.005</b>                           | <b>0.002</b>                              | <b>0.013</b>                                         | <b>0.009</b>                              |
| <b>Vehicle Operation</b>                     | <b>75.717</b>                                               | <b>1.000</b>                            | <b>0.128</b>                           | <b>0.002</b>                              | <b>0.033</b>                                         | <b>0.001</b>                              |
| <b>LSD Total</b>                             | <b>92.814</b>                                               | <b>1.207</b>                            | <b>0.141</b>                           | <b>0.006</b>                              | <b>0.071</b>                                         | <b>0.022</b>                              |

Presented below are the results for all environmental impacts for GTW-biodiesel for scenarios with landfill gas flaring, landfill gas co-generation of heat and electricity, and a scenario without GTW waste management (omits impacts associated with delivery of GTW to the transfer station and GTW wastewater and waste solids disposal. These results are compared to soybean-

237 biodiesel and LSD. Note that the values of soybean-biodiesel and LSD do not change with each  
238 GTW scenario.

239 The  $GWP_{100}$  was determined for the GTW-biodiesel process from 2-40% lipid content and  
240 compared to the soybean-biodiesel process and LSD process shown in Figure SI-S4.

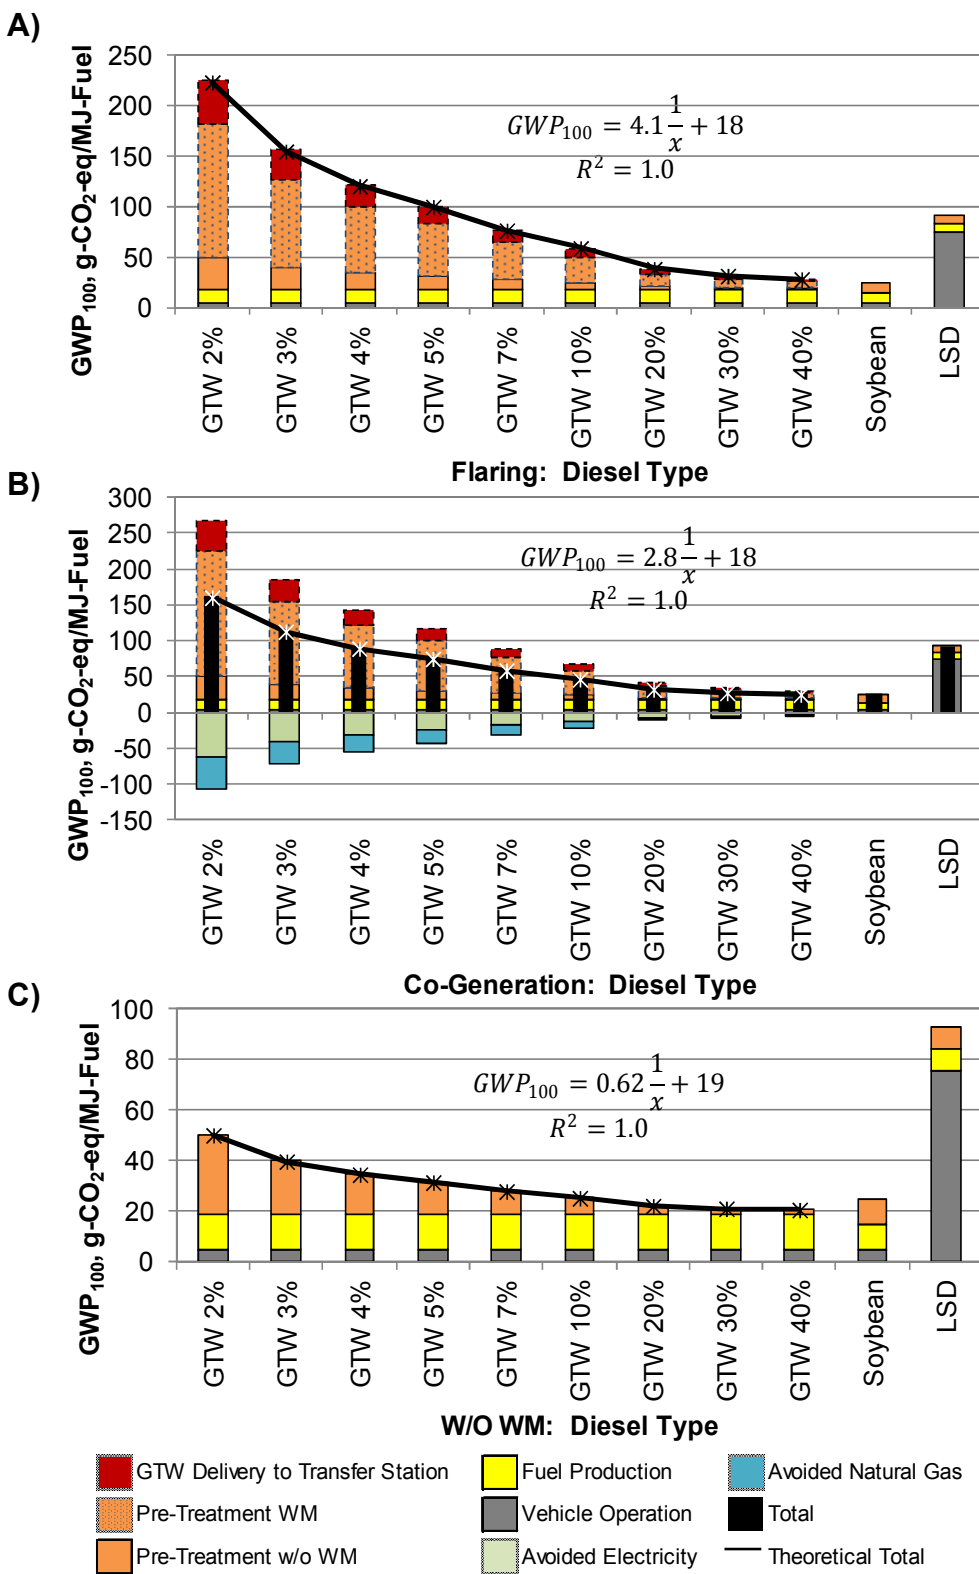

**Figure SI-S4.** 100-y Global Warming Potential Complete Parametric Study of GTW-Biodiesel Compared to Soybean-biodiesel and LSD for A) Flaring landfill gas, B) Co-generation of landfill

gas, and C) without GTW waste management. The stacked bars represent GTW-biodiesel stages: delivery of GTW to transfer station (red), pre-treatment WM (orange with blue dots), pre-treatment without WM (orange), fuel production (yellow), vehicle operation (gray), avoided electricity production from co-generation (light green), and avoided natural gas from co-generation (teal). The total GWP<sub>100</sub> (black bar) and modeled curve (black line) are also shown.

The following tables show the GWP<sub>100</sub> value by process stage, the percent contribution of each process stage, and the percent reduction compared to soybean-biodiesel and LSD for each of the waste scenarios.

253 **Table SI-S10.** Landfill Gas Flaring Scenario for 100-y Global Warming Potential

| <b>Diesel Type</b>                                               | <b>GTW<br/>2%</b> | <b>GTW<br/>3%</b> | <b>GTW<br/>4%</b> | <b>GTW<br/>5%</b> | <b>GTW<br/>7%</b> | <b>GTW<br/>10%</b> | <b>GTW<br/>20%</b> | <b>GTW<br/>30%</b> | <b>GTW<br/>40%</b> | <b>Soy-<br/>bean</b> | <b>LSD</b> |
|------------------------------------------------------------------|-------------------|-------------------|-------------------|-------------------|-------------------|--------------------|--------------------|--------------------|--------------------|----------------------|------------|
| <b><i>GWP<sub>100</sub>,<br/>g-CO<sub>2</sub>-eq/MJ-fuel</i></b> |                   |                   |                   |                   |                   |                    |                    |                    |                    |                      |            |
| Delivery to<br>Transfer Station                                  | 44                | 29                | 22                | 18                | 13                | 8                  | 4                  | 3                  | 2                  | N/A                  | N/A        |
| Pre-Treatment<br>WM                                              | 131               | 87                | 65                | 52                | 37                | 25                 | 12                 | 8                  | 6                  | N/A                  | N/A        |
| Pre-Treatment<br>w/o WM                                          | 31                | 21                | 16                | 13                | 9                 | 6                  | 3                  | 2                  | 1                  | 11                   | 9          |
| Fuel Production                                                  | 14                | 14                | 14                | 14                | 14                | 14                 | 14                 | 14                 | 14                 | 10                   | 8          |
| Vehicle<br>Operation                                             | 5                 | 5                 | 5                 | 5                 | 5                 | 5                  | 5                  | 5                  | 5                  | 5                    | 5          |
| <b>Total</b>                                                     | <b>226</b>        | <b>156</b>        | <b>122</b>        | <b>101</b>        | <b>77</b>         | <b>59</b>          | <b>39</b>          | <b>32</b>          | <b>28</b>          | <b>25</b>            | <b>93</b>  |
| <b><i>Percent<br/>Contribution, %</i></b>                        |                   |                   |                   |                   |                   |                    |                    |                    |                    |                      |            |
| Delivery to<br>Transfer Station                                  | 20                | 19                | 18                | 17                | 16                | 15                 | 11                 | 9                  | 7                  | N/A                  | N/A        |
| Pre-Treatment<br>WM                                              | 58                | 56                | 54                | 51                | 48                | 43                 | 32                 | 25                 | 20                 | N/A                  | N/A        |
| Pre-Treatment<br>w/o WM                                          | 14                | 13                | 13                | 12                | 12                | 10                 | 8                  | 6                  | 5                  | 42                   | 9          |
| Fuel Production                                                  | 6                 | 9                 | 12                | 14                | 18                | 24                 | 37                 | 45                 | 50                 | 38                   | 9          |
| Vehicle<br>Operation                                             | 2                 | 3                 | 4                 | 5                 | 6                 | 8                  | 12                 | 15                 | 17                 | 19                   | 82         |
| <b><i>Reduction, %</i></b>                                       |                   |                   |                   |                   |                   |                    |                    |                    |                    |                      |            |
| Compared to<br>Soybean                                           | 802               | 525               | 386               | 303               | 208               | 137                | 54                 | 26                 | 13                 | 0                    | 271        |
| Compared to<br>LSD                                               | 143               | 69                | 31                | 9                 | -17               | -36                | -58                | -66                | -70                | -73                  | 0          |

254  
255

256 **Table SI-S11.** Landfill Gas with Co-Generation Scenario for 100-y Global Warming Potential

| <b>Diesel Type</b>                                               | <b>GTW<br/>2%</b> | <b>GTW<br/>3%</b> | <b>GTW<br/>4%</b> | <b>GTW<br/>5%</b> | <b>GTW<br/>7%</b> | <b>GTW<br/>10%</b> | <b>GTW<br/>20%</b> | <b>GTW<br/>30%</b> | <b>GTW<br/>40%</b> | <b>Soy-<br/>bean</b> | <b>LSD</b> |
|------------------------------------------------------------------|-------------------|-------------------|-------------------|-------------------|-------------------|--------------------|--------------------|--------------------|--------------------|----------------------|------------|
| <b><i>GWP<sub>100</sub>,<br/>g-CO<sub>2</sub>-eq/MJ-fuel</i></b> |                   |                   |                   |                   |                   |                    |                    |                    |                    |                      |            |
| Delivery to<br>Transfer Station                                  | 44                | 29                | 22                | 18                | 13                | 9                  | 4                  | 3                  | 2                  | N/A                  | N/A        |
| Pre-treatment<br>WM                                              | 175               | 116               | 87                | 69                | 49                | 34                 | 17                 | 11                 | 8                  | N/A                  | N/A        |
| Pre-treatment<br>w/o WM                                          | 31                | 21                | 16                | 13                | 9                 | 6                  | 3                  | 2                  | 1                  | 11                   | 9          |
| Fuel Production                                                  | 14                | 14                | 14                | 14                | 14                | 14                 | 14                 | 14                 | 14                 | 10                   | 8          |
| Vehicle<br>Operation                                             | 5                 | 5                 | 5                 | 5                 | 5                 | 5                  | 5                  | 5                  | 5                  | 5                    | 78         |
| Avoided<br>Electricity                                           | -62               | -41               | -31               | -25               | -18               | -12                | -6                 | -4                 | -3                 | N/A                  | N/A        |
| Avoided Natural<br>Gas                                           | -45               | -30               | -23               | -18               | -13               | -9                 | -5                 | -3                 | -2                 | N/A                  | N/A        |
| <b>Total</b>                                                     | <b>162</b>        | <b>114</b>        | <b>90</b>         | <b>76</b>         | <b>59</b>         | <b>57</b>          | <b>32</b>          | <b>27</b>          | <b>25</b>          | <b>25</b>            | <b>93</b>  |
| <b><i>Percent<br/>Contribution, %</i></b>                        |                   |                   |                   |                   |                   |                    |                    |                    |                    |                      |            |
| Delivery to<br>Transfer Station                                  | 27                | 26                | 24                | 23                | 21                | 19                 | 13                 | 10                 | 8                  | N/A                  | N/A        |
| Pre-treatment<br>w/o WM                                          | 19                | 18                | 17                | 17                | 15                | 13                 | 9                  | 7                  | 6                  | 42                   | 9          |
| Fuel Production                                                  | 9                 | 12                | 16                | 19                | 24                | 30                 | 44                 | 52                 | 57                 | 38                   | 9          |
| Vehicle<br>Operation                                             | 3                 | 4                 | 5                 | 6                 | 8                 | 10                 | 15                 | 17                 | 19                 | 19                   | 82         |
| Avoided<br>Electricity                                           | -38               | -36               | -34               | -33               | -30               | -26                | -19                | -15                | -12                | N/A                  | N/A        |
| Avoided Natural<br>Gas                                           | -28               | -27               | -25               | -24               | -22               | -19                | -14                | -11                | -9                 | N/A                  | N/A        |
| <b><i>Reduction, %</i></b>                                       |                   |                   |                   |                   |                   |                    |                    |                    |                    |                      |            |
| Compared to<br>Soybean                                           | 547               | 355               | 259               | 201               | 136               | 86                 | 29                 | 9                  | 0                  | 0                    | 271        |
| Compared to<br>LSD                                               | 75                | 23                | -3                | -19               | -36               | -50                | -65                | -70                | -73                | -73                  | 0          |

257

258

259 **Table SI-S12.** Without GTW Waste Management Scenario for 100-y Global Warming Potential

| <b>Diesel Type</b>                                               | <b>GTW<br/>2%</b> | <b>GTW<br/>3%</b> | <b>GTW<br/>4%</b> | <b>GTW<br/>5%</b> | <b>GTW<br/>7%</b> | <b>GTW<br/>10%</b> | <b>GTW<br/>20%</b> | <b>GTW<br/>30%</b> | <b>GTW<br/>40%</b> | <b>Soy-<br/>bean</b> | <b>LSD</b> |
|------------------------------------------------------------------|-------------------|-------------------|-------------------|-------------------|-------------------|--------------------|--------------------|--------------------|--------------------|----------------------|------------|
| <b><i>GWP<sub>100</sub>,<br/>g-CO<sub>2</sub>-eq/MJ-fuel</i></b> |                   |                   |                   |                   |                   |                    |                    |                    |                    |                      |            |
| Pre-treatment                                                    | 31                | 21                | 16                | 13                | 9                 | 6                  | 3                  | 2                  | 2                  | 11                   | 9          |
| Fuel Production                                                  | 14                | 14                | 14                | 14                | 14                | 14                 | 14                 | 14                 | 14                 | 10                   | 8          |
| Vehicle<br>Operation                                             | 5                 | 5                 | 5                 | 5                 | 5                 | 5                  | 5                  | 5                  | 5                  | 5                    | 76         |
| <b>Total</b>                                                     | <b>50</b>         | <b>40</b>         | <b>35</b>         | <b>32</b>         | <b>28</b>         | <b>25</b>          | <b>22</b>          | <b>21</b>          | <b>20</b>          | <b>25</b>            | <b>93</b>  |
| <b><i>Percent<br/>Contribution, %</i></b>                        |                   |                   |                   |                   |                   |                    |                    |                    |                    |                      |            |
| Pre-treatment                                                    | 62                | 52                | 45                | 40                | 32                | 25                 | 14                 | 9                  | 7                  | 42                   | 9          |
| Fuel Production                                                  | 28                | 36                | 41                | 45                | 51                | 56                 | 64                 | 68                 | 69                 | 38                   | 9          |
| Vehicle<br>Operation                                             | 10                | 12                | 14                | 15                | 17                | 19                 | 22                 | 23                 | 23                 | 19                   | 82         |
| <b><i>Reduction, %</i></b>                                       |                   |                   |                   |                   |                   |                    |                    |                    |                    |                      |            |
| Compared to<br>Soybean                                           | 101               | 59                | 38                | 26                | 11                | 1                  | -12                | -16                | -18                | 0                    | 271        |
| Compared to<br>LSD                                               | -46               | -57               | -63               | -66               | -70               | -73                | -76                | -77                | -78                | -73                  | 0          |

260  
261 ***Fossil Cumulative Energy Demand (Fossil CED)***

262 The fossil cumulative energy demand (fossil CED) was determined for the GTW-biodiesel  
263 process from 2-40% lipid content and compared to the soybean-biodiesel process and LSD  
264 process shown in Figure SI-S5.

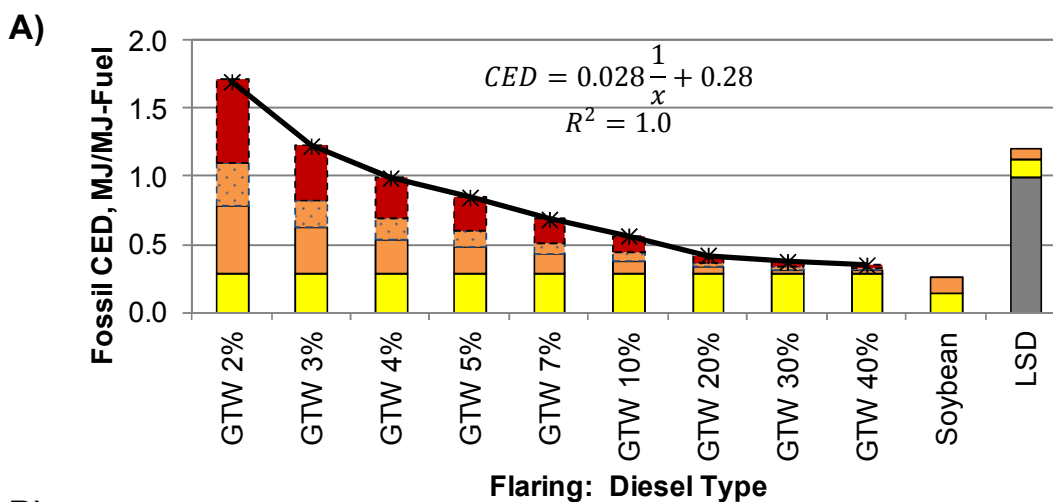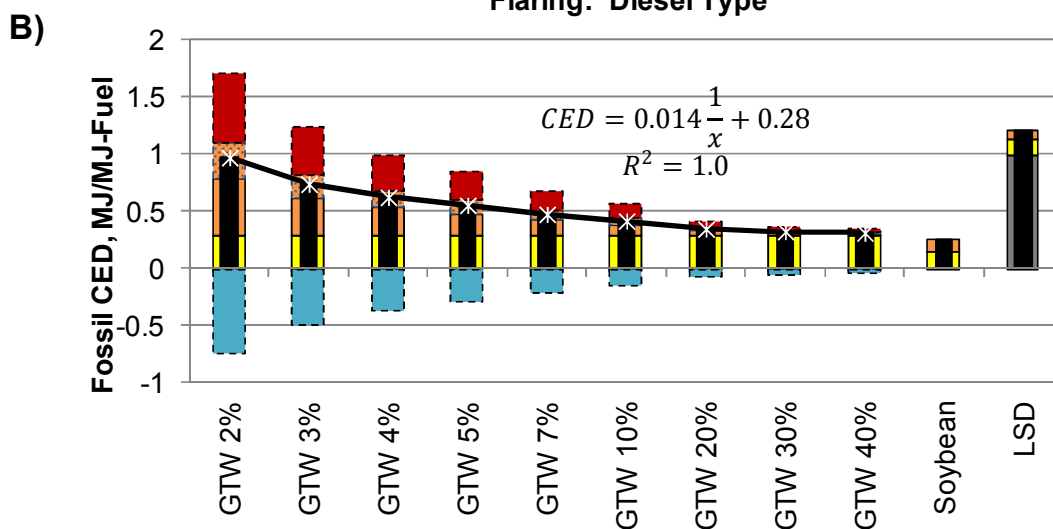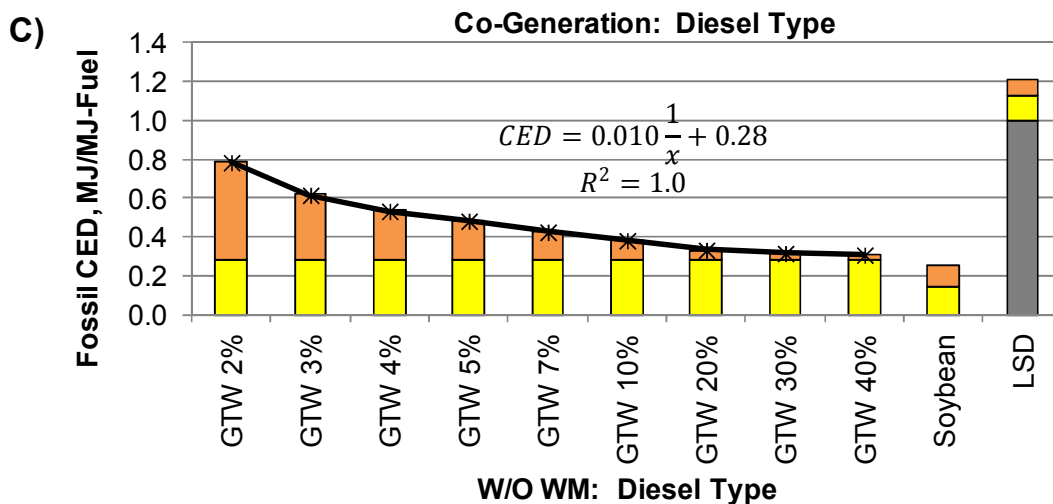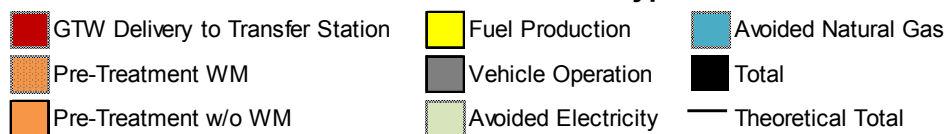



**Figure SI-S5.** Fossil Cumulative Energy Demand Complete Parametric Study of GTW-Biodiesel Compared to Soybean-biodiesel and LSD for A) Flaring landfill gas, B) Co-generation of landfill gas, and C) without GTW waste management. The stacked bars represent GTW-biodiesel stages: delivery of GTW to transfer station (red), pre-treatment WM (orange with blue dots), pre-treatment without WM (orange), fuel production (yellow), vehicle operation (gray), avoided electricity production from co-generation (light green), and avoided natural gas from co-generation (teal). The total  $CED_{Fossil}$  (black bar) and modeled curve (black line) are also shown.

The following tables show the  $CED_{Fossil}$  value by process stage, the percent contribution of each process stage, and the percent reduction compared to soybean-biodiesel and LSD for each of the waste scenarios.

277 **Table SI-S13.** Landfill Gas with Flaring Scenario for Fossil Cumulative Energy Demand

| <b>Diesel Type</b>                        | <b>GTW<br/>2%</b> | <b>GTW<br/>3%</b> | <b>GTW<br/>4%</b> | <b>GTW<br/>5%</b> | <b>GTW<br/>7%</b> | <b>GTW<br/>10%</b> | <b>GTW<br/>20%</b> | <b>GTW<br/>30%</b> | <b>GTW<br/>40%</b> | <b>Soy-<br/>bean</b> | <b>LSD</b> |
|-------------------------------------------|-------------------|-------------------|-------------------|-------------------|-------------------|--------------------|--------------------|--------------------|--------------------|----------------------|------------|
| <i><b>Fossil CED,<br/>MJ/MJ-Fuel</b></i>  |                   |                   |                   |                   |                   |                    |                    |                    |                    |                      |            |
| <b>Delivery to<br/>Transfer Station</b>   | 0.62              | 0.41              | 0.31              | 0.25              | 0.18              | 0.12               | 0.06               | 0.04               | 0.03               | N/A                  | N/A        |
| <b>Pre-Treatment<br/>WM</b>               | 0.31              | 0.20              | 0.15              | 0.12              | 0.08              | 0.06               | 0.03               | 0.02               | 0.01               | N/A                  | N/A        |
| <b>Pre-Treatment<br/>w/o WM</b>           | 0.51              | 0.34              | 0.25              | 0.20              | 0.14              | 0.10               | 0.05               | 0.03               | 0.02               | 0.11                 | 0.08       |
| <b>Fuel Production</b>                    | 0.28              | 0.28              | 0.28              | 0.28              | 0.28              | 0.28               | 0.28               | 0.28               | 0.28               | 0.14                 | 0.13       |
| <b>Vehicle<br/>Operation</b>              | 0.00              | 0.00              | 0.00              | 0.00              | 0.00              | 0.00               | 0.00               | 0.00               | 0.00               | 0.00                 | 1.00       |
| <b>Total</b>                              | 1.72              | 1.24              | 1.00              | 0.85              | 0.69              | 0.56               | 0.42               | 0.37               | 0.35               | 0.26                 | 1.21       |
| <i><b>Percent<br/>Contribution, %</b></i> |                   |                   |                   |                   |                   |                    |                    |                    |                    |                      |            |
| <b>Delivery to<br/>Transfer Station</b>   | 36                | 33                | 31                | 29                | 26                | 22                 | 14                 | 11                 | 9                  | N/A                  | N/A        |
| <b>Pre-Treatment<br/>WM</b>               | 18                | 16                | 15                | 14                | 12                | 10                 | 6                  | 4                  | 3                  | N/A                  | N/A        |
| <b>Pre-Treatment<br/>w/o WM</b>           | 29                | 27                | 25                | 24                | 21                | 18                 | 12                 | 8                  | 7                  | 44                   | 7          |
| <b>Fuel Production</b>                    | 17                | 23                | 29                | 33                | 41                | 50                 | 68                 | 76                 | 82                 | 56                   | 11         |
| <b>Vehicle<br/>Operation</b>              | 0                 | 0                 | 0                 | 0                 | 0                 | 0                  | 0                  | 0                  | 0                  | 0                    | 83         |
| <i><b>Reduction, %</b></i>                |                   |                   |                   |                   |                   |                    |                    |                    |                    |                      |            |
| <b>Compared to<br/>Soybean</b>            | 568               | 381               | 287               | 231               | 167               | 119                | 63                 | 45                 | 35                 | 0                    | 370        |
| <b>Compared to LSD</b>                    | 42                | 2                 | -18               | -29               | -43               | -53                | -65                | -69                | -71                | -79                  | 0          |

278

279

280 **Table SI-S14.** Landfill Gas with Co-Generation Scenario for Fossil Cumulative Energy

281 Demand

| Diesel Type                                     | GTW<br>2%   | GTW<br>3%   | GTW<br>4%   | GTW<br>5%   | GTW<br>7%   | GTW<br>10%  | GTW<br>20%  | GTW<br>30%  | GTW<br>40%  | Soy-<br>bean | LSD         |
|-------------------------------------------------|-------------|-------------|-------------|-------------|-------------|-------------|-------------|-------------|-------------|--------------|-------------|
| <i>Fossil CED,<br/>MJ/MJ-fuel</i>               |             |             |             |             |             |             |             |             |             |              |             |
| Delivery to<br>Transfer<br>Station              | 0.62        | 0.41        | 0.31        | 0.25        | 0.18        | 0.12        | 0.06        | 0.04        | 0.03        | N/A          | N/A         |
| Pre-treatment<br>WM                             | 0.31        | 0.20        | 0.15        | 0.12        | 0.08        | 0.06        | 0.03        | 0.02        | 0.01        | N/A          | N/A         |
| Pre-treatment<br>w/o WM                         | 0.51        | 0.34        | 0.25        | 0.20        | 0.14        | 0.10        | 0.05        | 0.03        | 0.02        | 0.11         | 0.08        |
| Fuel<br>Production                              | 0.28        | 0.28        | 0.28        | 0.28        | 0.28        | 0.28        | 0.28        | 0.28        | 0.28        | 0.14         | 0.13        |
| Vehicle<br>Operation                            | 0.00        | 0.00        | 0.00        | 0.00        | 0.00        | 0.00        | 0.00        | 0.00        | 0.00        | 0.00         | 1.00        |
| Avoided<br>Electricity                          | -0.01       | -0.004      | -0.003      | -0.003      | -0.002      | -0.001      | -0.001      | <-0.001     | <-0.001     | N/A          | N/A         |
| Avoided<br>Natural Gas                          | -0.73       | -0.49       | -0.37       | -0.29       | -0.21       | -0.15       | -0.07       | -0.05       | -0.04       | N/A          | N/A         |
| <b>Total</b>                                    | <b>0.98</b> | <b>0.74</b> | <b>0.63</b> | <b>0.56</b> | <b>0.48</b> | <b>0.42</b> | <b>0.35</b> | <b>0.32</b> | <b>0.31</b> | <b>0.26</b>  | <b>1.21</b> |
| <i>Percent<br/>Contribution,<br/>%</i>          |             |             |             |             |             |             |             |             |             |              |             |
| Delivery to<br>Transfer<br>Station              | 63          | 55          | 49          | 44          | 37          | 30          | 18          | 12          | 10          | N/A          | N/A         |
| Pre-treatment<br>WM                             | 31          | 27          | 24          | 22          | 18          | 14          | 8           | 5           | 4           | N/A          | N/A         |
| Pre-treatment<br>w/o WM                         | 52          | 45          | 40          | 36          | 30          | 24          | 14          | 10          | 7           | 44           | 7           |
| Fuel<br>Production                              | 29          | 38          | 45          | 51          | 60          | 68          | 82          | 88          | 91          | 56           | 11          |
| Vehicle<br>Operation                            | 0           | 0           | 0           | 0           | 0           | 0           | 0           | 0           | 0           | 0            | 83          |
| Avoided<br>Electricity                          | -1          | -1          | -1          | -1          | <-1         | <-1         | <-1         | <-1         | <-1         | N/A          | N/A         |
| Avoided<br>Natural Gas                          | -75         | 65          | 58          | 53          | -44         | -35         | -21         | -15         | -12         | N/A          | N/A         |
| <b>Reduction, %<br/>Compared to<br/>Soybean</b> | <b>281</b>  | <b>190</b>  | <b>144</b>  | <b>117</b>  | <b>85</b>   | <b>62</b>   | <b>35</b>   | <b>25</b>   | <b>21</b>   | <b>0</b>     | <b>370</b>  |
| <b>Compared to<br/>LSD</b>                      | <b>-19</b>  | <b>-38</b>  | <b>-48</b>  | <b>-54</b>  | <b>-61</b>  | <b>-66</b>  | <b>-71</b>  | <b>-73</b>  | <b>-74</b>  | <b>-79</b>   | <b>0</b>    |

282

283

284 **Table SI-S15.** Without GTW Waste Management Scenario for Fossil Cumulative Energy

| <b>Lipid Content</b>                                   | <b>GTW<br/>2%</b> | <b>GTW<br/>3%</b> | <b>GTW<br/>4%</b> | <b>GTW<br/>5%</b> | <b>GTW<br/>7%</b> | <b>GTW<br/>10%</b> | <b>GTW<br/>20%</b> | <b>GTW<br/>30%</b> | <b>GTW<br/>40%</b> | <b>Soy-<br/>bean</b> | <b>LSD</b>  |
|--------------------------------------------------------|-------------------|-------------------|-------------------|-------------------|-------------------|--------------------|--------------------|--------------------|--------------------|----------------------|-------------|
| <i><b>Fossil CED,<br/>MJ/MJ-fuel</b></i>               |                   |                   |                   |                   |                   |                    |                    |                    |                    |                      |             |
| Pre-treatment                                          | 0.51              | 0.34              | 0.25              | 0.20              | 0.14              | 0.10               | 0.05               | 0.03               | 0.02               | 0.11                 | 0.08        |
| Fuel Production                                        | 0.28              | 0.28              | 0.28              | 0.28              | 0.28              | 0.28               | 0.28               | 0.28               | 0.28               | 0.14                 | 0.13        |
| Vehicle<br>Operation                                   | 0.00              | 0.00              | 0.00              | 0.00              | 0.00              | 0.00               | 0.00               | 0.00               | 0.00               | 0.00                 | 1.00        |
| <b>Total</b>                                           | <b>0.79</b>       | <b>0.62</b>       | <b>0.54</b>       | <b>0.48</b>       | <b>0.43</b>       | <b>0.38</b>        | <b>0.33</b>        | <b>0.32</b>        | <b>0.31</b>        | <b>0.26</b>          | <b>1.21</b> |
| <i><b>Percent<br/>Contribution, %</b></i>              |                   |                   |                   |                   |                   |                    |                    |                    |                    |                      |             |
| Pre-treatment                                          | 64                | 54                | 47                | 41                | 33                | 26                 | 15                 | 10                 | 7                  | 44                   | 7           |
| Fuel Production                                        | 36                | 46                | 53                | 59                | 67                | 74                 | 85                 | 90                 | 93                 | 56                   | 11          |
| Vehicle<br>Operation                                   | 0                 | 0                 | 0                 | 0                 | 0                 | 0                  | 0                  | 0                  | 0                  | 0                    | 83          |
| <i><b>Reduction, %<br/>Compared to<br/>Soybean</b></i> |                   |                   |                   |                   |                   |                    |                    |                    |                    |                      |             |
| Compared to Soybean                                    | 207               | 141               | 108               | 89                | 66                | 49                 | 29                 | 23                 | 19                 | 0                    | 370         |
| Compared to LSD                                        | -35               | -49               | -56               | -60               | -65               | -68                | -72                | -74                | -75                | -79                  | 0           |

285

286 **Carbon Monoxide**

287 The carbon monoxide (CO) emissions were determined for the GTW-biodiesel process from 2-

288 40% lipid content and compared to the soybean-biodiesel process and LSD process shown in

289 Figure SI-S6.

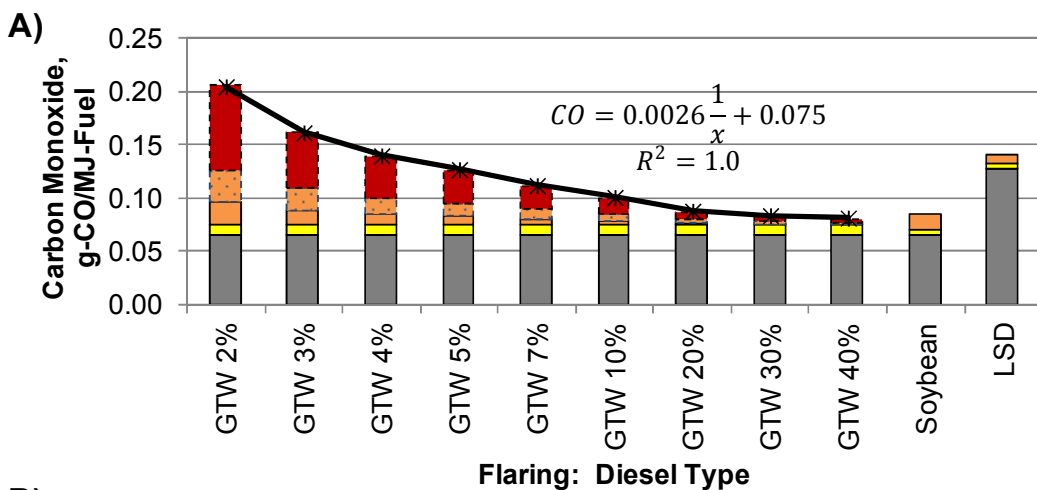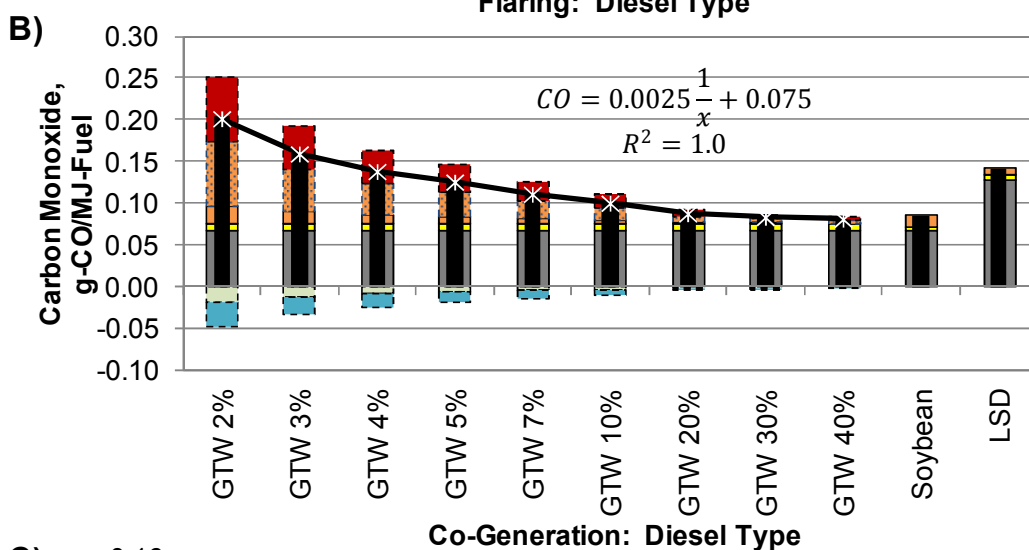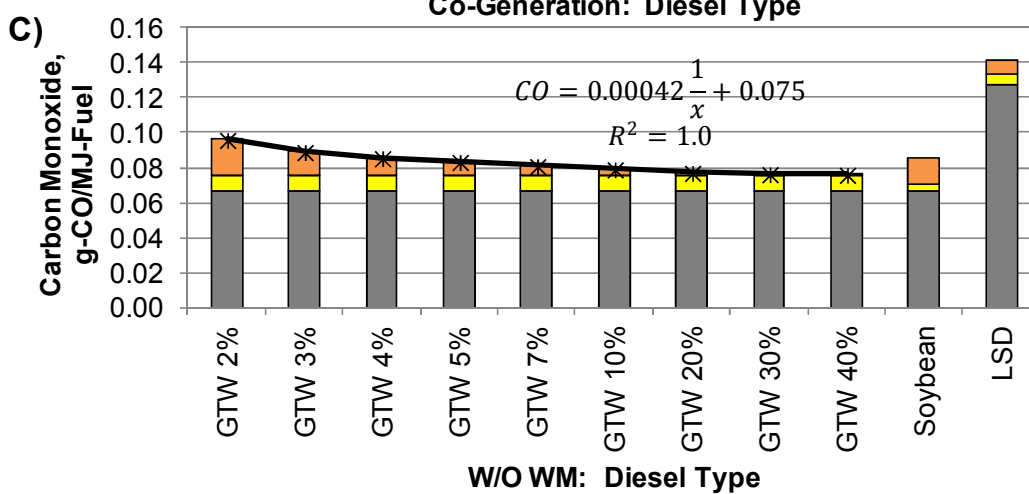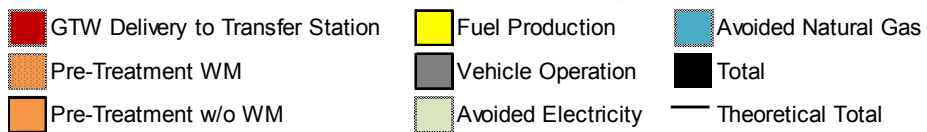

**Figure SI-S6.** Carbon Monoxide Complete Emissions Parametric Study of GTW-Biodiesel Compared to Soybean-biodiesel and LSD A) Flaring landfill gas, B) Co-generation of landfill gas, and C) without GTW waste management. The stacked bars represent GTW-biodiesel stages: delivery of GTW to transfer station (red), pre-treatment WM (orange with blue dots), pre-treatment without WM (orange), fuel production (yellow), vehicle operation (gray), avoided electricity production from co-generation (light green), and avoided natural gas from co-generation (teal). The total CO (black bar) and modeled curve (black line) are also shown.

The following tables show the CO emissions by process stage, the percent contribution of each process stage, and the percent reduction compared to soybean-biodiesel and LSD for each of the waste scenarios.

302 **Table SI-S16.** Landfill Gas Flaring Scenario for Carbon Monoxide Emissions

| <b>Diesel Type</b>                              | <b>GTW<br/>2%</b> | <b>GTW<br/>3%</b> | <b>GTW<br/>4%</b> | <b>GTW<br/>5%</b> | <b>GTW<br/>7%</b> | <b>GTW<br/>10%</b> | <b>GTW<br/>20%</b> | <b>GTW<br/>30%</b> | <b>GTW<br/>40%</b> | <b>Soy-<br/>bean</b> | <b>LSD</b>   |
|-------------------------------------------------|-------------------|-------------------|-------------------|-------------------|-------------------|--------------------|--------------------|--------------------|--------------------|----------------------|--------------|
| <b><i>Carbon Monoxide,<br/>g-CO/MJ-Fuel</i></b> |                   |                   |                   |                   |                   |                    |                    |                    |                    |                      |              |
| Delivery to<br>Transfer Station                 | 0.079             | 0.053             | 0.039             | 0.032             | 0.022             | 0.016              | 0.008              | 0.005              | 0.004              | N/A                  | N/A          |
| Pre-treatment<br>WM                             | 0.030             | 0.020             | 0.015             | 0.012             | 0.009             | 0.006              | 0.003              | 0.002              | 0.001              | N/A                  | N/A          |
| Pre-treatment w/o<br>WM                         | 0.021             | 0.014             | 0.011             | 0.008             | 0.006             | 0.004              | 0.002              | 0.001              | 0.001              | 0.014                | 0.008        |
| Fuel Production                                 | 0.009             | 0.009             | 0.009             | 0.009             | 0.009             | 0.009              | 0.009              | 0.009              | 0.009              | 0.004                | 0.005        |
| Vehicle<br>Operation                            | 0.066             | 0.066             | 0.066             | 0.066             | 0.066             | 0.066              | 0.066              | 0.066              | 0.066              | 0.066                | 0.128        |
| <b>Total</b>                                    | <b>0.206</b>      | <b>0.162</b>      | <b>0.140</b>      | <b>0.127</b>      | <b>0.112</b>      | <b>0.101</b>       | <b>0.088</b>       | <b>0.083</b>       | <b>0.081</b>       | <b>0.085</b>         | <b>0.141</b> |
| <b><i>Percent<br/>Contribution, %</i></b>       |                   |                   |                   |                   |                   |                    |                    |                    |                    |                      |              |
| Delivery to<br>Transfer Station                 | 38                | 33                | 28                | 25                | 20                | 16                 | 9                  | 6                  | 5                  | N/A                  | N/A          |
| Pre-treatment<br>WM                             | 10                | 9                 | 8                 | 7                 | 5                 | 4                  | 2                  | 2                  | 1                  | N/A                  | N/A          |
| Pre-treatment w/o<br>WM                         | 15                | 12                | 11                | 9                 | 8                 | 6                  | 3                  | 2                  | 1                  | 17                   | 6            |
| Fuel Production                                 | 4                 | 5                 | 6                 | 7                 | 8                 | 9                  | 10                 | 11                 | 11                 | 5                    | 4            |
| Vehicle<br>Operation                            | 32                | 41                | 47                | 52                | 59                | 66                 | 76                 | 80                 | 82                 | 78                   | 90           |
| <b><i>Reduction, %</i></b>                      |                   |                   |                   |                   |                   |                    |                    |                    |                    |                      |              |
| Compared to<br>Soybean                          | 142               | 90                | 65                | 49                | 32                | 18                 | 3                  | -2                 | -5                 | 0                    | 66           |
| Compared to LSD                                 | 46                | 15                | -1                | -10               | -21               | -29                | -38                | -41                | -43                | -40                  | 0            |

303  
304

305 **Table SI-S17.** Landfill Gas Co-Generation Scenario for Carbon Monoxide Emissions

| Diesel Type                                                             | GTW<br>2%    | GTW<br>3%    | GTW<br>4%    | GTW<br>5%    | GTW<br>7%    | GTW<br>10%   | GTW<br>20%   | GTW<br>30%   | GTW<br>40%   | Soy-<br>bean | LSD          |
|-------------------------------------------------------------------------|--------------|--------------|--------------|--------------|--------------|--------------|--------------|--------------|--------------|--------------|--------------|
| <b>Carbon Monoxide,<br/>g-CO/MJ-fuel</b>                                |              |              |              |              |              |              |              |              |              |              |              |
| Delivery to<br>Transfer<br>Station                                      | 0.079        | 0.053        | 0.039        | 0.032        | 0.022        | 0.016        | 0.008        | 0.005        | 0.004        | N/A          | N/A          |
| Pre-treatment<br>WM                                                     | 0.076        | 0.051        | 0.038        | 0.030        | 0.022        | 0.015        | 0.007        | 0.005        | 0.004        | N/A          | N/A          |
| Pre-treatment<br>w/o WM                                                 | 0.021        | 0.014        | 0.011        | 0.008        | 0.006        | 0.004        | 0.002        | 0.001        | 0.001        | 0.014        | 0.008        |
| Fuel<br>Production                                                      | 0.009        | 0.009        | 0.009        | 0.009        | 0.009        | 0.009        | 0.009        | 0.009        | 0.009        | 0.004        | 0.005        |
| Vehicle<br>Operation                                                    | 0.066        | 0.066        | 0.066        | 0.066        | 0.066        | 0.066        | 0.066        | 0.066        | 0.066        | 0.066        | 0.128        |
| Avoided<br>Electricity                                                  | -0.018       | -0.012       | -0.009       | -0.007       | -0.005       | -0.004       | -0.002       | -0.001       | -0.001       | N/A          | N/A          |
| Avoided<br>Natural Gas                                                  | -0.031       | -0.020       | -0.015       | -0.012       | -0.009       | -0.006       | -0.003       | -0.002       | -0.002       | N/A          | N/A          |
| <b>Total</b>                                                            | <b>0.203</b> | <b>0.160</b> | <b>0.139</b> | <b>0.126</b> | <b>0.111</b> | <b>0.100</b> | <b>0.087</b> | <b>0.083</b> | <b>0.081</b> | <b>0.085</b> | <b>0.141</b> |
| <b>Percent<br/>Contribution,<br/>%</b>                                  |              |              |              |              |              |              |              |              |              |              |              |
| Delivery to<br>Transfer Station                                         | 39           | 33           | 28           | 25           | 20           | 16           | 9            | 6            | 5            | N/A          | N/A          |
| Pre-treatment<br>WM                                                     | 38           | 32           | 27           | 24           | 19           | 15           | 8            | 6            | 4            | N/A          | N/A          |
| Pre-treatment<br>w/o WM                                                 | 10           | 9            | 8            | 7            | 5            | 4            | 2            | 2            | 1            | 17           | 6            |
| Fuel Production                                                         | 4            | 5            | 6            | 7            | 8            | 9            | 10           | 11           | 11           | 5            | 4            |
| Vehicle<br>Operation                                                    | 33           | 41           | 48           | 53           | 60           | 66           | 76           | 80           | 82           | 78           | 90           |
| Avoided<br>Electricity                                                  | -9           | -8           | -7           | -6           | -5           | -4           | -2           | -1           | -1           | N/A          | N/A          |
| Avoided<br>Natural Gas                                                  | -15          | -13          | -11          | -10          | -8           | -6           | -4           | -2           | -2           | N/A          | N/A          |
| <b>Reduction, %<br/>Compared to<br/>Soybean<br/>Compared to<br/>LSD</b> |              |              |              |              |              |              |              |              |              |              |              |
| Soybean                                                                 | 139          | 88           | 63           | 48           | 31           | 18           | 3            | -2           | -5           | 0            | 66           |
| LSD                                                                     | 44           | 13           | -2           | -11          | -21          | -29          | -38          | -41          | -43          | -40          | 0            |

306  
307



308 **Table SI-S18.** Without GTW Waste Management Scenario for Carbon Monoxide Emissions

| <b>Diesel Type</b>                                   | <b>GTW<br/>2%</b> | <b>GTW<br/>3%</b> | <b>GTW<br/>4%</b> | <b>GTW<br/>5%</b> | <b>GTW<br/>7%</b> | <b>GTW<br/>10%</b> | <b>GTW<br/>20%</b> | <b>GTW<br/>30%</b> | <b>GTW<br/>40%</b> | <b>Soy-<br/>bean</b> | <b>LSD</b>   |
|------------------------------------------------------|-------------------|-------------------|-------------------|-------------------|-------------------|--------------------|--------------------|--------------------|--------------------|----------------------|--------------|
| <b><i>Carbon<br/>Monoxide, g-<br/>CO/MJ-fuel</i></b> |                   |                   |                   |                   |                   |                    |                    |                    |                    |                      |              |
| Pre-treatment                                        | 0.021             | 0.014             | 0.011             | 0.008             | 0.006             | 0.004              | 0.002              | 0.001              | 0.001              | 0.014                | 0.008        |
| Fuel Production                                      | 0.009             | 0.009             | 0.009             | 0.009             | 0.009             | 0.009              | 0.009              | 0.009              | 0.009              | 0.004                | 0.005        |
| Vehicle<br>Operation                                 | 0.066             | 0.066             | 0.066             | 0.066             | 0.066             | 0.066              | 0.066              | 0.066              | 0.066              | 0.066                | 0.128        |
| <b>Total</b>                                         | <b>0.096</b>      | <b>0.089</b>      | <b>0.086</b>      | <b>0.083</b>      | <b>0.081</b>      | <b>0.079</b>       | <b>0.077</b>       | <b>0.076</b>       | <b>0.076</b>       | <b>0.085</b>         | <b>0.141</b> |
| <b><i>Percent<br/>Contribution, %</i></b>            |                   |                   |                   |                   |                   |                    |                    |                    |                    |                      |              |
| Pre-treatment                                        | 22                | 16                | 12                | 10                | 7                 | 5                  | 3                  | 2                  | 1                  | 17                   | 6            |
| Fuel Production                                      | 9                 | 10                | 10                | 10                | 11                | 11                 | 11                 | 11                 | 12                 | 5                    | 4            |
| Vehicle<br>Operation                                 | 69                | 74                | 77                | 79                | 82                | 84                 | 86                 | 87                 | 87                 | 78                   | 90           |
| <b><i>Reduction, %</i></b>                           |                   |                   |                   |                   |                   |                    |                    |                    |                    |                      |              |
| Compared to<br>Soybean                               | 13                | 5                 | 1                 | -2                | -5                | -7                 | -9                 | -10                | -11                | 0                    | 66           |
| Compared to<br>LSD                                   | -32               | -37               | -39               | -41               | -43               | -44                | -45                | -46                | -46                | -40                  | 0            |

309

310 ***Particulate matter***

311 The particulate matter (PM) emissions were determined for the GTW-biodiesel process from 2-  
312 40% lipid content and compared to the soybean-biodiesel process and LSD process shown in  
313 Figure SI-S7.

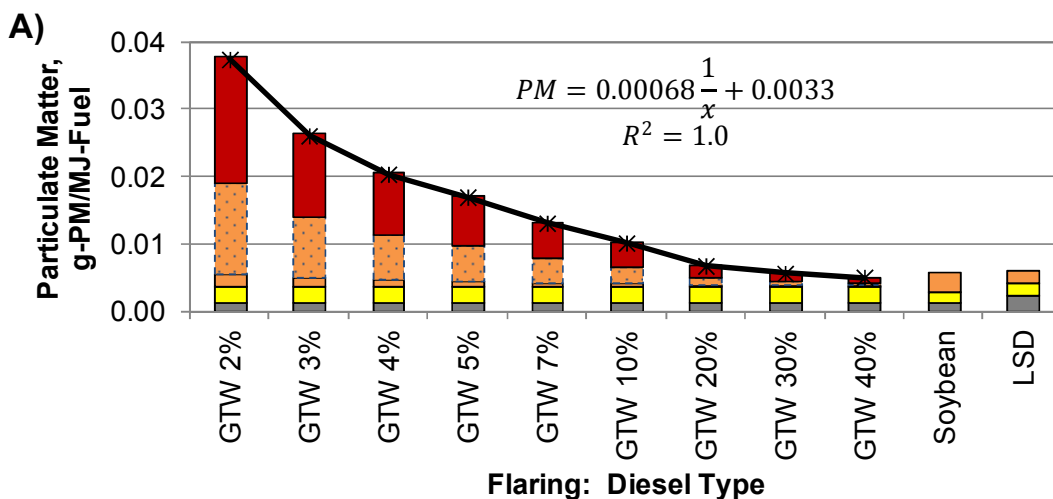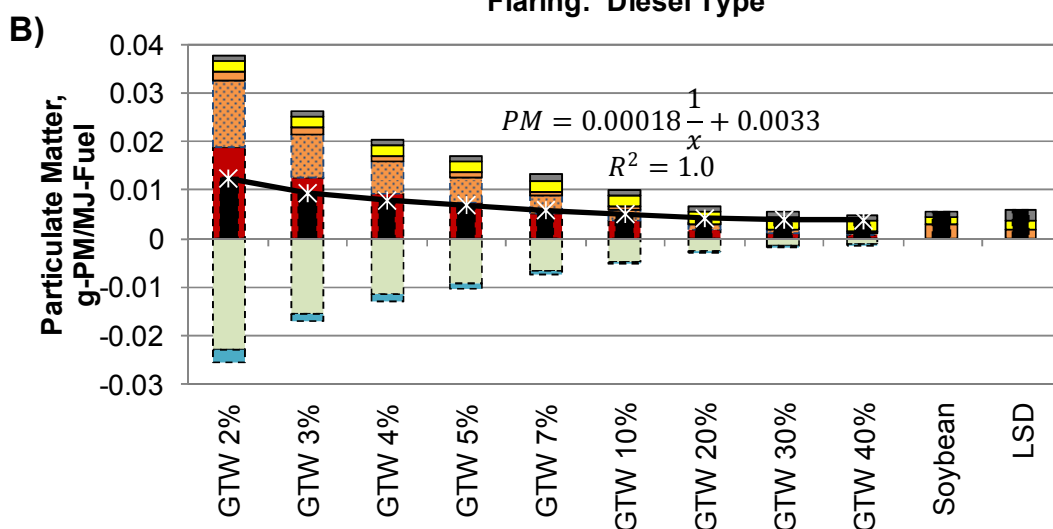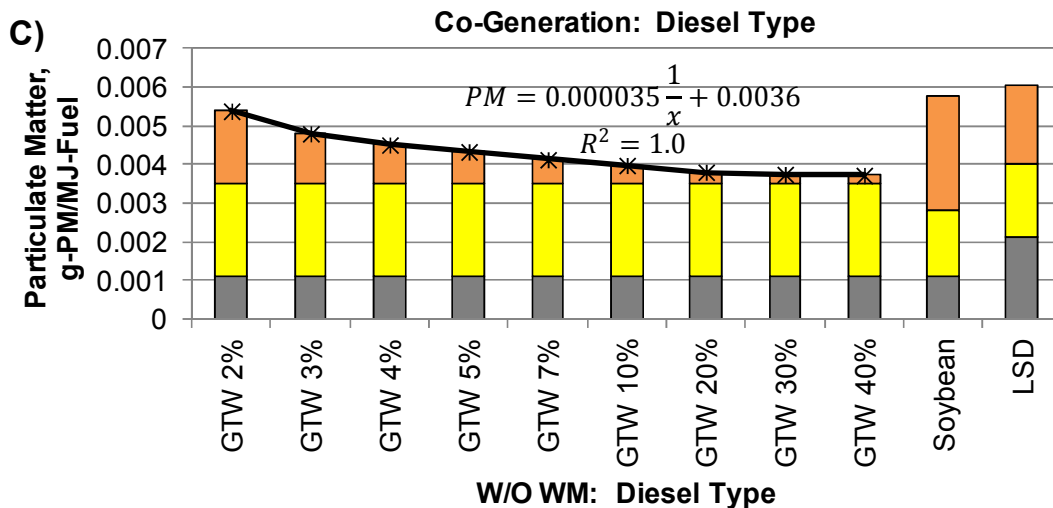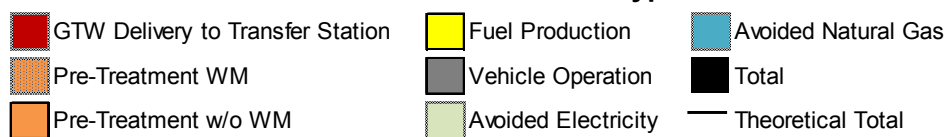

**Figure SI-S7.** Particulate Matter Complete Parametric Study of GTW-Biodiesel Compared to Soybean-biodiesel and LSD for A) Flaring landfill gas, B) Co-generation of landfill gas, and C) without GTW waste management. The stacked bars represent GTW-biodiesel stages: delivery of GTW to transfer station (red), pre-treatment WM (orange with blue dots), pre-treatment without WM (orange), fuel production (yellow), vehicle operation (gray), avoided electricity production from co-generation (light green), and avoided natural gas from co-generation (teal). The total PM (black bar) and modeled curve (black line) are also shown.

The following tables show the PM emissions by process stage, the percent contribution of each process stage, and the percent reduction compared to soybean-biodiesel and LSD for each of the waste scenarios.

326 **Table SI-S19.** Landfill Gas Flaring Scenario for Particulate Matter Emissions

| <b>Diesel Types</b>                             | <b>GTW<br/>2%</b> | <b>GTW<br/>3%</b> | <b>GTW<br/>4%</b> | <b>GTW<br/>5%</b> | <b>GTW<br/>7%</b> | <b>GTW<br/>10%</b> | <b>GTW<br/>20%</b> | <b>GTW<br/>30%</b> | <b>GTW<br/>40%</b> | <b>Soy-<br/>bean</b> | <b>LSD</b>   |
|-------------------------------------------------|-------------------|-------------------|-------------------|-------------------|-------------------|--------------------|--------------------|--------------------|--------------------|----------------------|--------------|
| <b>Particulate<br/>Matter,<br/>g-PM/MJ-Fuel</b> |                   |                   |                   |                   |                   |                    |                    |                    |                    |                      |              |
| Delivery to<br>Transfer Station                 | 0.019             | 0.012             | 0.009             | 0.007             | 0.005             | 0.004              | 0.002              | 0.001              | 0.001              | N/A                  | N/A          |
| Pre-treatment<br>WM                             | 0.014             | 0.009             | 0.007             | 0.005             | 0.004             | 0.002              | 0.001              | 0.001              | 0.000              | N/A                  | N/A          |
| Pre-treatment<br>w/o WM                         | 0.002             | 0.001             | 0.001             | 0.001             | 0.001             | 0.000              | 0.000              | 0.000              | 0.000              | 0.003                | 0.001        |
| Fuel Production                                 | 0.002             | 0.002             | 0.002             | 0.002             | 0.002             | 0.002              | 0.002              | 0.002              | 0.002              | 0.002                | 0.002        |
| Vehicle<br>Operation                            | 0.001             | 0.001             | 0.001             | 0.001             | 0.001             | 0.001              | 0.001              | 0.001              | 0.001              | 0.001                | 0.002        |
| <b>Total</b>                                    | <b>0.038</b>      | <b>0.026</b>      | <b>0.021</b>      | <b>0.017</b>      | <b>0.013</b>      | <b>0.010</b>       | <b>0.007</b>       | <b>0.006</b>       | <b>0.005</b>       | <b>0.006</b>         | <b>0.006</b> |
| <b>Percent<br/>Contribution, %</b>              |                   |                   |                   |                   |                   |                    |                    |                    |                    |                      |              |
| Delivery to<br>Transfer Station                 | 50                | 48                | 46                | 44                | 40                | 37                 | 27                 | 22                 | 18                 | N/A                  | N/A          |
| Pre-Treatment<br>WM                             | 36                | 34                | 32                | 31                | 28                | 24                 | 16                 | 11                 | 7                  | N/A                  | N/A          |
| Pre-Treatment<br>w/o WM                         | 5                 | 5                 | 5                 | 5                 | 5                 | 5                  | 4                  | 4                  | 4                  | 52                   | 33           |
| Fuel Production                                 | 6                 | 9                 | 12                | 14                | 18                | 23                 | 36                 | 43                 | 48                 | 29                   | 31           |
| Vehicle<br>Operation                            | 3                 | 4                 | 5                 | 7                 | 9                 | 11                 | 17                 | 20                 | 23                 | 19                   | 35           |
| <b>Reduction, %</b>                             |                   |                   |                   |                   |                   |                    |                    |                    |                    |                      |              |
| Compared to<br>Soybean                          | 553               | 354               | 254               | 195               | 128               | 76                 | 16                 | -4                 | -14                | 0                    | 5            |
| Compared to<br>LSD                              | 523               | 334               | 238               | 181               | 117               | 68                 | 11                 | -8                 | -18                | -5                   | 0            |

327  
328

329 **Table SI-S20.** Landfill Gas Co-Generation Scenario for Particulate Matter Emissions

| Lipid Content                        | GTW 2% | GTW 3% | GTW 4% | GTW 5% | GTW 7% | GTW 10% | GTW 20% | GTW 30% | GTW 40% | Soy-bean | LSD   |
|--------------------------------------|--------|--------|--------|--------|--------|---------|---------|---------|---------|----------|-------|
| <b>Carbon Monoxide, g-CO/MJ-fuel</b> |        |        |        |        |        |         |         |         |         |          |       |
| Delivery to Transfer Station         | 0.019  | 0.012  | 0.009  | 0.007  | 0.005  | 0.004   | 0.002   | 0.001   | 0.001   | N/A      | N/A   |
| Pre-treatment WM                     | 0.014  | 0.009  | 0.007  | 0.005  | 0.004  | 0.002   | 0.001   | 0.001   | 0.000   | N/A      | N/A   |
| Pre-treatment w/o WM                 | 0.002  | 0.001  | 0.001  | 0.001  | 0.001  | 0.000   | 0.000   | 0.000   | 0.000   | 0.003    | 0.002 |
| Fuel Production                      | 0.002  | 0.002  | 0.002  | 0.002  | 0.002  | 0.002   | 0.002   | 0.002   | 0.002   | 0.002    | 0.002 |
| Vehicle Operation                    | 0.001  | 0.001  | 0.001  | 0.001  | 0.001  | 0.001   | 0.001   | 0.001   | 0.001   | 0.001    | 0.002 |
| Avoided Electricity                  | -0.023 | -0.015 | -0.011 | -0.009 | -0.006 | -0.005  | -0.002  | -0.002  | -0.001  | N/A      | N/A   |
| Avoided Natural Gas                  | -0.003 | -0.002 | -0.001 | -0.001 | -0.001 | -0.001  | 0.000   | 0.000   | 0.000   | N/A      | N/A   |
| Total                                | 0.012  | 0.009  | 0.008  | 0.007  | 0.006  | 0.005   | 0.004   | 0.004   | 0.004   | 0.006    | 0.006 |
| <b>Percent Contribution, %</b>       |        |        |        |        |        |         |         |         |         |          |       |
| Delivery to Transfer Station         | 150    | 133    | 119    | 108    | 90     | 73      | 44      | 31      | 24      | N/A      | N/A   |
| Pre-Treatment WM                     | 109    | 96     | 85     | 76     | 63     | 48      | 25      | 15      | 10      | N/A      | N/A   |
| Pre-Treatment w/o WM                 | 15     | 14     | 13     | 12     | 11     | 9       | 7       | 6       | 5       | 52       | 33    |
| Fuel Production                      | 19     | 25     | 30     | 34     | 40     | 47      | 57      | 62      | 64      | 29       | 31    |
| Vehicle Operation                    | 9      | 12     | 14     | 16     | 19     | 22      | 27      | 29      | 30      | 19       | 35    |
| Avoided Electricity                  | -182   | -161   | -145   | -131   | -109   | -89     | -54     | -39     | -31     | N/A      | N/A   |
| Avoided Natural Gas                  | -21    | -18    | -16    | -15    | -12    | -10     | -6      | -4      | -3      | N/A      | N/A   |
| <b>Reduction, %</b>                  |        |        |        |        |        |         |         |         |         |          |       |
| Compared to Soybean                  | 116    | 63     | 36     | 20     | 3      | -12     | -28     | -33     | -36     | 0        | 5     |
| Compared to LSD                      | 106    | 55     | 30     | 14     | -2     | -16     | -31     | -36     | -39     | -5       | 0     |

330  
331

332 **Table SI-S21.** Without GTW Waste Management Scenario for Particulate Matter Emissions

| <b>Diesel Type</b>                             | <b>GTW<br/>2%</b> | <b>GTW<br/>3%</b> | <b>GTW<br/>4%</b> | <b>GTW<br/>5%</b> | <b>GTW<br/>7%</b> | <b>GTW<br/>10%</b> | <b>GTW<br/>20%</b> | <b>GTW<br/>30%</b> | <b>GTW<br/>40%</b> | <b>Soy-<br/>bean</b> | <b>LSD</b>   |
|------------------------------------------------|-------------------|-------------------|-------------------|-------------------|-------------------|--------------------|--------------------|--------------------|--------------------|----------------------|--------------|
| <b><i>Particulate Matter, g-PM/MJ-fuel</i></b> |                   |                   |                   |                   |                   |                    |                    |                    |                    |                      |              |
| Delivery to Transfer Station                   | 0.019             | 0.012             | 0.009             | 0.007             | 0.005             | 0.004              | 0.002              | 0.001              | 0.001              | N/A                  | N/A          |
| Pre-treatment                                  | 0.002             | 0.001             | 0.001             | 0.001             | 0.001             | 0.000              | 0.000              | 0.000              | 0.000              | 0.003                | 0.002        |
| Fuel Production                                | 0.002             | 0.002             | 0.002             | 0.002             | 0.002             | 0.002              | 0.002              | 0.002              | 0.002              | 0.002                | 0.002        |
| Vehicle Operation                              | 0.001             | 0.001             | 0.001             | 0.001             | 0.001             | 0.001              | 0.001              | 0.001              | 0.001              | 0.001                | 0.002        |
| <b>Total</b>                                   | <b>0.005</b>      | <b>0.005</b>      | <b>0.005</b>      | <b>0.004</b>      | <b>0.004</b>      | <b>0.004</b>       | <b>0.004</b>       | <b>0.004</b>       | <b>0.004</b>       | <b>0.006</b>         | <b>0.006</b> |
| <b><i>Percent Contribution, %</i></b>          |                   |                   |                   |                   |                   |                    |                    |                    |                    |                      |              |
| Pre-treatment                                  | 35                | 27                | 22                | 19                | 15                | 12                 | 8                  | 6                  | 5                  | 52                   | 33           |
| Fuel Production                                | 44                | 49                | 53                | 55                | 58                | 60                 | 63                 | 64                 | 64                 | 29                   | 31           |
| Vehicle Operation                              | 21                | 23                | 25                | 26                | 27                | 28                 | 30                 | 30                 | 30                 | 19                   | 35           |
| <b><i>Reduction, %</i></b>                     |                   |                   |                   |                   |                   |                    |                    |                    |                    |                      |              |
| Compared to Soybean                            | -7                | -17               | -22               | -25               | -29               | -31                | -34                | -35                | -36                | 0                    | 5            |
| Compared to LSD                                | -11               | -21               | -26               | -28               | -32               | -34                | -37                | -38                | -39                | -5                   | 0            |

333  
334 ***Mono-Nitrogen Oxide***

335 The mono-nitrogen oxide (NO<sub>x</sub>) emissions were determined for the GTW-biodiesel process  
336 from 2-40% lipid content and compared to the soybean-biodiesel process and LSD process  
337 shown in Figure SI-S8.

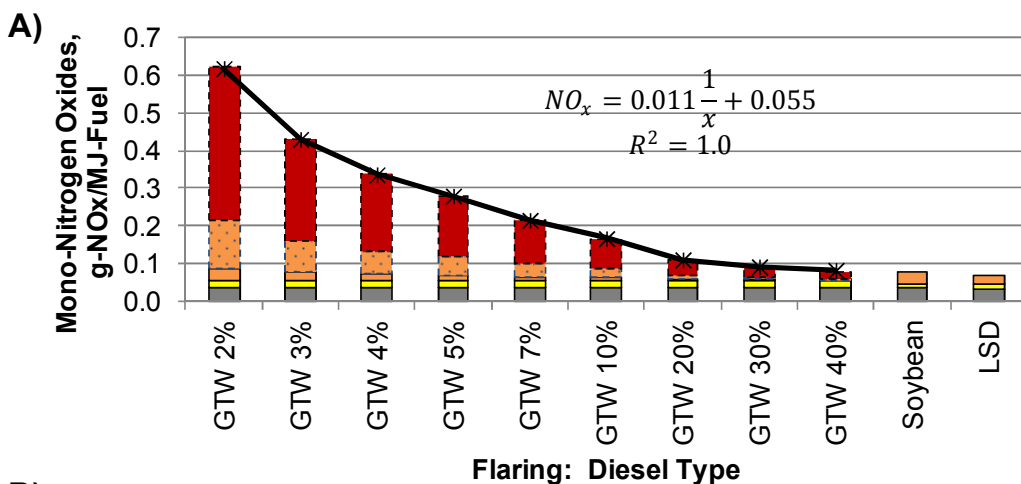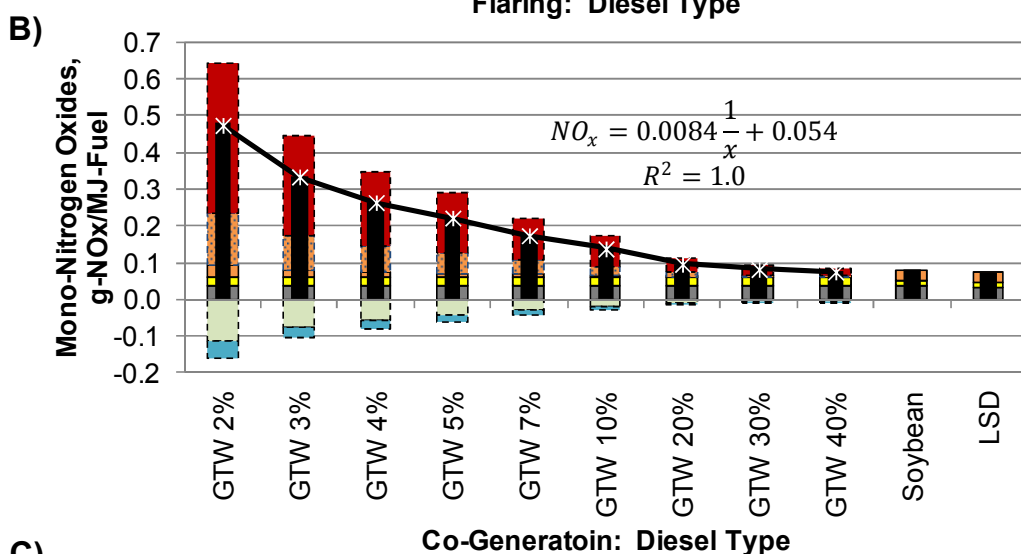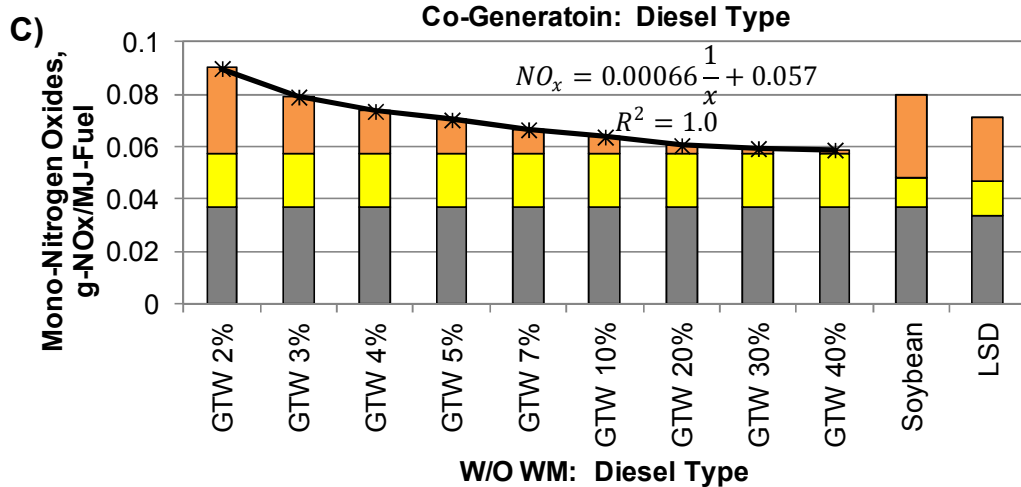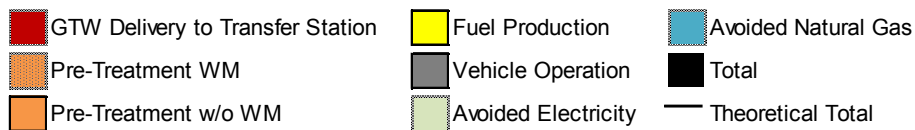

**Figure SI-S8.** Mono-nitrogen Oxide Complete Parametric Study of GTW-Biodiesel Compared to Soybean-biodiesel and LSD for A) Flaring landfill gas, B) Co-generation of landfill gas, and C) without GTW waste management. The stacked bars represent GTW-biodiesel stages: delivery of GTW to transfer station (red), pre-treatment WM (orange with blue dots), pre-treatment without WM (orange), fuel production (yellow), vehicle operation (gray), avoided electricity production from co-generation (light green), and avoided natural gas from co-generation (teal). The total NO<sub>x</sub> (black bar) and modeled curve (black line) are also shown.

The following tables show the NO<sub>x</sub> emissions by process stage, the percent contribution of each process stage, and the percent reduction compared to soybean-biodiesel and LSD for each of the waste scenarios.



350 **Table SI-S22.** Landfill Gas Flaring Scenario for Mono-nitrogen Oxide Emissions

| <b>Diesel Type</b>                                       | <b>GTW<br/>2%</b> | <b>GTW<br/>3%</b> | <b>GTW<br/>4%</b> | <b>GTW<br/>5%</b> | <b>GTW<br/>7%</b> | <b>GTW<br/>10%</b> | <b>GTW<br/>20%</b> | <b>GTW<br/>30%</b> | <b>GTW<br/>40%</b> | <b>Soy-<br/>bean</b> | <b>LSD</b>   |
|----------------------------------------------------------|-------------------|-------------------|-------------------|-------------------|-------------------|--------------------|--------------------|--------------------|--------------------|----------------------|--------------|
| <b><i>Mono-nitrogen<br/>Oxide,<br/>g-NOx/MJ-Fuel</i></b> |                   |                   |                   |                   |                   |                    |                    |                    |                    |                      |              |
| Delivery to<br>Transfer Station                          | 0.406             | 0.271             | 0.203             | 0.162             | 0.115             | 0.081              | 0.040              | 0.026              | 0.019              | N/A                  | N/A          |
| Pre-treatment<br>WM                                      | 0.128             | 0.084             | 0.062             | 0.049             | 0.035             | 0.023              | 0.010              | 0.006              | 0.004              | N/A                  | N/A          |
| Pre-treatment<br>w/o WM                                  | 0.033             | 0.022             | 0.017             | 0.013             | 0.009             | 0.007              | 0.003              | 0.002              | 0.002              | 0.032                | 0.025        |
| Fuel Production                                          | 0.020             | 0.020             | 0.020             | 0.020             | 0.020             | 0.020              | 0.020              | 0.020              | 0.020              | 0.011                | 0.013        |
| Vehicle<br>Operation                                     | 0.037             | 0.037             | 0.037             | 0.037             | 0.037             | 0.037              | 0.037              | 0.037              | 0.037              | 0.037                | 0.033        |
| <b>Total</b>                                             | <b>0.625</b>      | <b>0.434</b>      | <b>0.339</b>      | <b>0.282</b>      | <b>0.217</b>      | <b>0.168</b>       | <b>0.110</b>       | <b>0.091</b>       | <b>0.082</b>       | <b>0.080</b>         | <b>0.071</b> |
| <b><i>Percent<br/>Contribution, %</i></b>                |                   |                   |                   |                   |                   |                    |                    |                    |                    |                      |              |
| Delivery to<br>Transfer Station                          | 65                | 62                | 60                | 58                | 53                | 48                 | 36                 | 29                 | 24                 | N/A                  | N/A          |
| Pre-treatment<br>WM                                      | 20                | 19                | 18                | 17                | 16                | 14                 | 9                  | 6                  | 4                  | N/A                  | N/A          |
| Pre-treatment<br>w/o WM                                  | 5                 | 5                 | 5                 | 5                 | 4                 | 4                  | 3                  | 2                  | 2                  | 40                   | 34           |
| Fuel Production                                          | 3                 | 5                 | 6                 | 7                 | 9                 | 12                 | 18                 | 22                 | 25                 | 14                   | 19           |
| Vehicle<br>Operation                                     | 6                 | 8                 | 11                | 13                | 17                | 22                 | 33                 | 40                 | 45                 | 46                   | 47           |
| <b><i>Reduction, %</i></b>                               |                   |                   |                   |                   |                   |                    |                    |                    |                    |                      |              |
| Compared to<br>Soybean                                   | 684               | 445               | 325               | 254               | 172               | 110                | 39                 | 15                 | 3                  | 0                    | -10          |
| Compared to<br>LSD                                       | 774               | 507               | 374               | 294               | 203               | 134                | 54                 | 28                 | 14                 | 11                   | 0            |

351

352

353 **Table SI-S23.** Landfill Gas Co-Generation Scenario for Mono-nitrogen Oxide Emissions

| Diesel Type                                              | GTW<br>2%    | GTW<br>3%    | GTW<br>4%    | GTW<br>5%    | GTW<br>7%    | GTW<br>10%   | GTW<br>20%   | GTW<br>30%   | GTW<br>40%   | Soy-<br>bean | LSD          |
|----------------------------------------------------------|--------------|--------------|--------------|--------------|--------------|--------------|--------------|--------------|--------------|--------------|--------------|
| <i><b>Mono-nitrogen<br/>Oxide,<br/>g-NOx/MJ-Fuel</b></i> |              |              |              |              |              |              |              |              |              |              |              |
| Delivery to<br>Transfer<br>Station                       | 0.406        | 0.271        | 0.203        | 0.162        | 0.115        | 0.081        | 0.040        | 0.026        | 0.019        | N/A          | N/A          |
| Pre-treatment<br>WM                                      | 0.142        | 0.094        | 0.070        | 0.055        | 0.039        | 0.026        | 0.012        | 0.007        | 0.004        | N/A          | N/A          |
| Pre-treatment<br>w/o WM                                  | 0.033        | 0.022        | 0.017        | 0.013        | 0.009        | 0.007        | 0.003        | 0.002        | 0.002        | 0.032        | 0.025        |
| Fuel<br>Production                                       | 0.020        | 0.020        | 0.020        | 0.020        | 0.020        | 0.020        | 0.020        | 0.020        | 0.020        | 0.011        | 0.013        |
| Vehicle<br>Operation                                     | 0.037        | 0.037        | 0.037        | 0.037        | 0.037        | 0.037        | 0.037        | 0.037        | 0.037        | 0.037        | 0.033        |
| Avoided<br>Electricity                                   | -0.112       | -0.075       | -0.056       | -0.045       | -0.032       | -0.022       | -0.011       | -0.007       | -0.006       | N/A          | N/A          |
| Avoided<br>Natural Gas                                   | -0.048       | -0.032       | -0.024       | -0.019       | -0.014       | -0.010       | -0.005       | -0.003       | -0.002       | N/A          | N/A          |
| <b>Total</b>                                             | <b>0.479</b> | <b>0.337</b> | <b>0.266</b> | <b>0.223</b> | <b>0.175</b> | <b>0.138</b> | <b>0.096</b> | <b>0.082</b> | <b>0.074</b> | <b>0.080</b> | <b>0.071</b> |
| <i><b>Percent<br/>Contribution,<br/>%</b></i>            |              |              |              |              |              |              |              |              |              |              |              |
| Delivery to<br>Transfer<br>Station                       | 85           | 80           | 76           | 73           | 66           | 58           | 42           | 32           | 26           | N/A          | N/A          |
| Pre-treatment<br>WM                                      | 30           | 28           | 26           | 25           | 22           | 19           | 12           | 8            | 6            | N/A          | N/A          |
| Pre-treatment<br>w/o WM                                  | 7            | 7            | 6            | 6            | 5            | 5            | 3            | 3            | 2            | 40           | 34           |
| Fuel<br>Production                                       | 4            | 6            | 8            | 9            | 12           | 15           | 21           | 25           | 27           | 14           | 19           |
| Vehicle<br>Operation                                     | 8            | 11           | 14           | 17           | 21           | 27           | 39           | 45           | 50           | 46           | 47           |
| Avoided<br>Electricity                                   | -23          | -22          | -21          | -20          | -18          | -16          | -12          | -9           | -8           | N/A          | N/A          |
| Avoided<br>Natural Gas                                   | -10          | -9           | -9           | -9           | -8           | -7           | -5           | -4           | -3           | N/A          | N/A          |
| <i><b>Reduction, %<br/>Compared to<br/>Soybean</b></i>   |              |              |              |              |              |              |              |              |              |              |              |
| Compared to<br>Soybean                                   | 501          | 323          | 234          | 180          | 120          | 74           | 20           | 2            | -6           | 0            | -10          |
| Compared to<br>LSD                                       | 570          | 371          | 272          | 212          | 145          | 93           | 34           | 14           | 4            | 11           | 0            |

354  
355

356 **Table SI-S24.** Without Waste Management Scenario for Mono-nitrogen Oxide Emissions

| <b>Diesel Type</b>                                        | <b>GTW<br/>2%</b> | <b>GTW<br/>3%</b> | <b>GTW<br/>4%</b> | <b>GTW<br/>5%</b> | <b>GTW<br/>7%</b> | <b>GTW<br/>10%</b> | <b>GTW<br/>20%</b> | <b>GTW<br/>30%</b> | <b>GTW<br/>40%</b> | <b>Soy-<br/>bean</b> | <b>LSD</b>   |
|-----------------------------------------------------------|-------------------|-------------------|-------------------|-------------------|-------------------|--------------------|--------------------|--------------------|--------------------|----------------------|--------------|
| <b><i>Mono-nitrogen<br/>Oxides,<br/>g-NOx/MJ-fuel</i></b> |                   |                   |                   |                   |                   |                    |                    |                    |                    |                      |              |
| Pre-treatment                                             | 0.033             | 0.022             | 0.017             | 0.013             | 0.009             | 0.007              | 0.003              | 0.002              | 0.002              | 0.032                | 0.025        |
| Fuel Production                                           | 0.020             | 0.020             | 0.020             | 0.020             | 0.020             | 0.020              | 0.020              | 0.020              | 0.020              | 0.011                | 0.013        |
| Vehicle<br>Operation                                      | 0.037             | 0.037             | 0.037             | 0.037             | 0.037             | 0.037              | 0.037              | 0.037              | 0.037              | 0.037                | 0.033        |
| <b>Total</b>                                              | <b>0.090</b>      | <b>0.079</b>      | <b>0.074</b>      | <b>0.070</b>      | <b>0.067</b>      | <b>0.064</b>       | <b>0.060</b>       | <b>0.059</b>       | <b>0.059</b>       | <b>0.080</b>         | <b>0.071</b> |
| <b><i>Percent<br/>Contribution,<br/>%</i></b>             |                   |                   |                   |                   |                   |                    |                    |                    |                    |                      |              |
| Pre-treatment                                             | 37                | 28                | 22                | 19                | 14                | 10                 | 5                  | 4                  | 3                  | 40                   | 34           |
| Fuel Production                                           | 22                | 26                | 27                | 29                | 30                | 32                 | 34                 | 34                 | 35                 | 14                   | 19           |
| Vehicle<br>Operation                                      | 41                | 47                | 50                | 52                | 55                | 58                 | 61                 | 62                 | 63                 | 46                   | 47           |
| <b><i>Reduction, %<br/>Compared to<br/>Soybean</i></b>    |                   |                   |                   |                   |                   |                    |                    |                    |                    |                      |              |
| Compared to<br>Soybean                                    | 13                | 0                 | -7                | -12               | -16               | -20                | -24                | -25                | -26                | 0                    | -10          |
| <b><i>Reduction, %<br/>Compared to<br/>LSD</i></b>        |                   |                   |                   |                   |                   |                    |                    |                    |                    |                      |              |
| Compared to<br>LSD                                        | 26                | 11                | 3                 | -1                | -7                | -11                | -15                | -17                | -18                | 11                   | 0            |

357 ***Sulfur Oxides***

359 The sulfur oxide (SO<sub>x</sub>) emissions were determined for the GTW-biodiesel process from 2-40%  
360 lipid content and compared to the soybean-biodiesel process and LSD process shown in Figure  
361 SI-S9. The soybean-biodiesel pre-treatment dominates where soybean production accounts for  
362 47% of total emissions due to the use of sulfuric acid in the production of phosphoric acid (P<sub>2</sub>O<sub>5</sub>)  
363 applied as a fertilizer. Soybean-biodiesel combustion does not have SO<sub>x</sub> emissions because the  
364 feedstock/fuel does not contain sulfur.

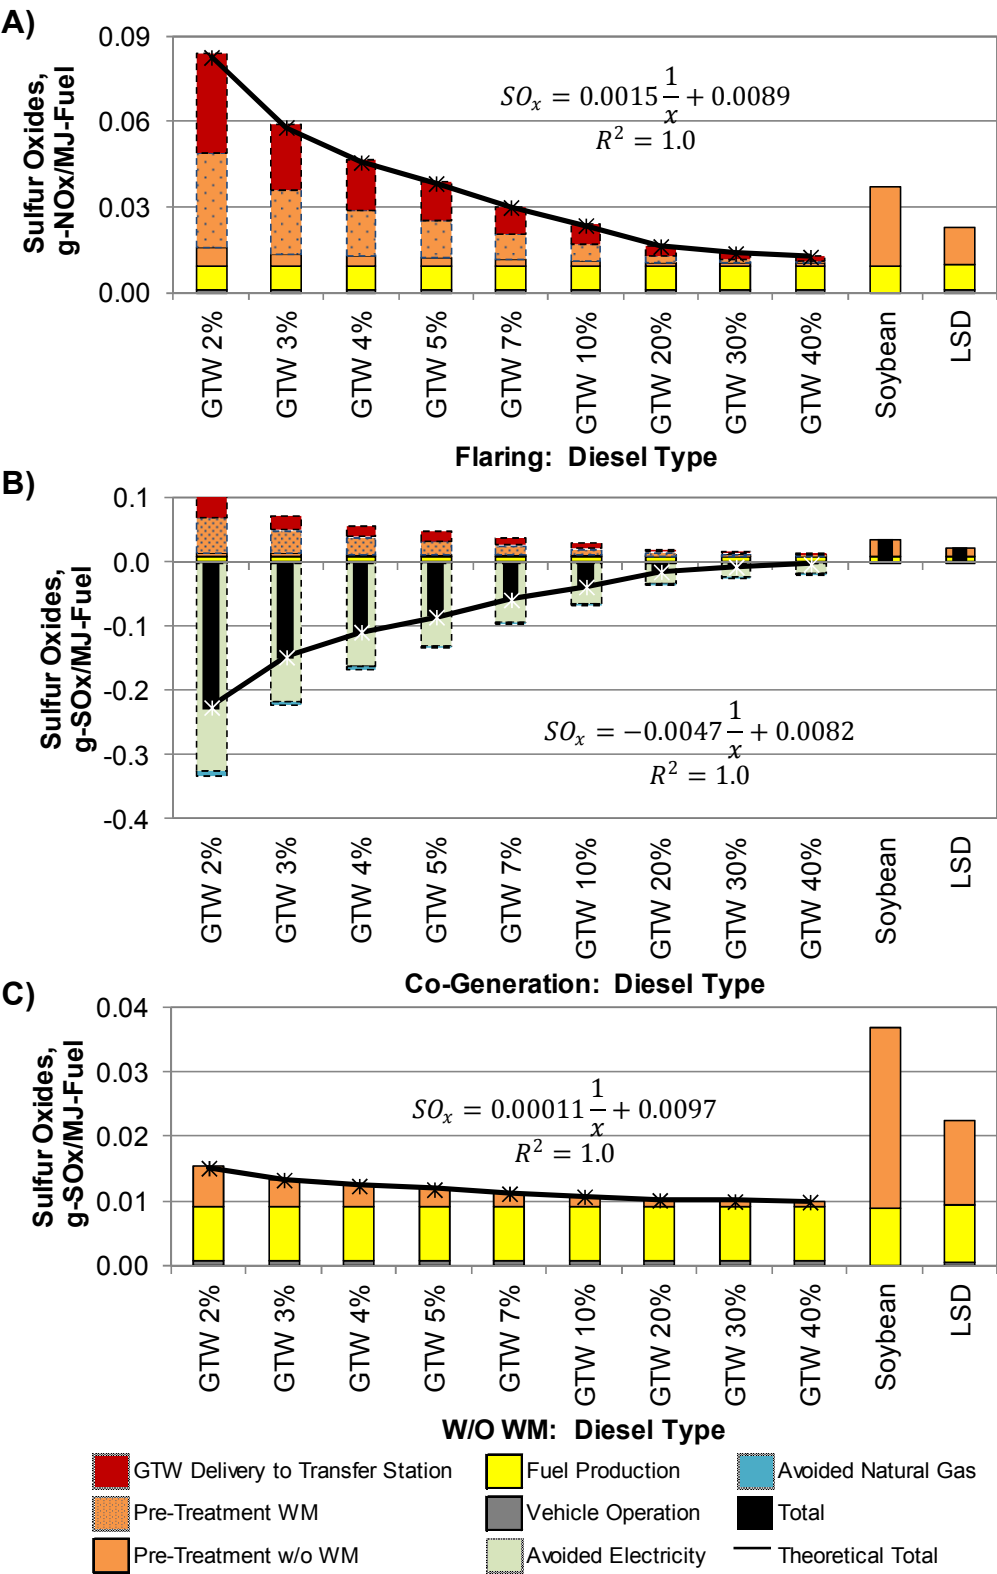

**Figure SI-S9.** Sulfur Oxide Complete Parametric Study of GTW-Biodiesel Compared to Soybean-biodiesel and LSD for A) Flaring landfill gas, B) Co-generation of landfill gas, and C) without GTW waste management. The stacked bars represent GTW-biodiesel stages: delivery of GTW to transfer station (red), pre-treatment WM (orange with blue dots), pre-treatment without WM (orange), fuel production (yellow), vehicle operation (gray), avoided electricity production from co-generation (light green), and avoided natural gas from co-generation (teal). The total SO<sub>x</sub> (black bar) and modeled curve (black line) are also shown.

The following tables show the SO<sub>x</sub> emissions by process stage, the percent contribution of each process stage, and the percent reduction compared to soybean-biodiesel and LSD for each of the waste scenarios.

378 **Table SI-S25.** Landfill Gas Flaring Scenario for Sulfur Oxide Emissions

| <b>Diesel Type</b>                             | <b>GTW<br/>2%</b> | <b>GTW<br/>3%</b> | <b>GTW<br/>4%</b> | <b>GTW<br/>5%</b> | <b>GTW<br/>7%</b> | <b>GTW<br/>10%</b> | <b>GTW<br/>20%</b> | <b>GTW<br/>30%</b> | <b>GTW<br/>40%</b> | <b>Soy-<br/>bean</b> | <b>LSD</b>   |
|------------------------------------------------|-------------------|-------------------|-------------------|-------------------|-------------------|--------------------|--------------------|--------------------|--------------------|----------------------|--------------|
| <b><i>Sulfur Oxides,<br/>g-SOx/MJ-Fuel</i></b> |                   |                   |                   |                   |                   |                    |                    |                    |                    |                      |              |
| Delivery to<br>Transfer Station                | 0.035             | 0.023             | 0.017             | 0.014             | 0.010             | 0.007              | 0.003              | 0.002              | 0.002              | N/A                  | N/A          |
| Pre-treatment<br>WM                            | 0.033             | 0.022             | 0.016             | 0.013             | 0.009             | 0.006              | 0.003              | 0.001              | 0.001              | N/A                  | N/A          |
| Pre-treatment<br>w/o WM                        | 0.006             | 0.004             | 0.003             | 0.003             | 0.002             | 0.002              | 0.001              | 0.001              | 0.001              | 0.028                | 0.013        |
| Fuel Production                                | 0.008             | 0.008             | 0.008             | 0.008             | 0.008             | 0.008              | 0.008              | 0.008              | 0.008              | 0.009                | 0.009        |
| Vehicle<br>Operation                           | 0.001             | 0.001             | 0.001             | 0.001             | 0.001             | 0.001              | 0.001              | 0.001              | 0.001              | 0.000                | 0.001        |
| <b>Total</b>                                   | <b>0.084</b>      | <b>0.059</b>      | <b>0.046</b>      | <b>0.039</b>      | <b>0.030</b>      | <b>0.024</b>       | <b>0.016</b>       | <b>0.014</b>       | <b>0.012</b>       | <b>0.037</b>         | <b>0.022</b> |
| <b><i>Percent<br/>Contribution, %</i></b>      |                   |                   |                   |                   |                   |                    |                    |                    |                    |                      |              |
| Delivery to<br>Transfer Station                | 42                | 40                | 38                | 36                | 33                | 29                 | 21                 | 16                 | 13                 | N/A                  | N/A          |
| Pre-treatment<br>WM                            | 40                | 38                | 35                | 33                | 30                | 25                 | 16                 | 10                 | 6                  | N/A                  | N/A          |
| Pre-treatment<br>w/o WM                        | 7                 | 7                 | 7                 | 7                 | 7                 | 7                  | 7                  | 7                  | 7                  | 76                   | 58           |
| Fuel Production                                | 10                | 14                | 18                | 22                | 28                | 35                 | 51                 | 61                 | 67                 | 24                   | 39           |
| Vehicle<br>Operation                           | 1                 | 1                 | 2                 | 2                 | 3                 | 3                  | 5                  | 6                  | 6                  | 0                    | 2            |
| <b><i>Reduction, %</i></b>                     |                   |                   |                   |                   |                   |                    |                    |                    |                    |                      |              |
| Compared to<br>Soybean                         | 127               | 59                | 25                | 5                 | -18               | -36                | -56                | -63                | -66                | 0                    | -39          |
| Compared to<br>LSD                             | 272               | 161               | 105               | 72                | 34                | 5                  | -28                | -39                | -45                | 64                   | 0            |

379

380

381 **Table SI-S26.** Landfill Gas Co-Generation Scenario for Sulfur Oxide Emissions

| <b>Lipid Content</b>                           | <b>GTW<br/>2%</b> | <b>GTW<br/>3%</b> | <b>GTW<br/>4%</b> | <b>GTW<br/>5%</b> | <b>GTW<br/>7%</b> | <b>GTW<br/>10%</b> | <b>GTW<br/>20%</b> | <b>GTW<br/>30%</b> | <b>GTW<br/>40%</b> | <b>S</b>  |
|------------------------------------------------|-------------------|-------------------|-------------------|-------------------|-------------------|--------------------|--------------------|--------------------|--------------------|-----------|
| <b><i>Sulfur Oxides,<br/>g-SOx/MJ-Fuel</i></b> |                   |                   |                   |                   |                   |                    |                    |                    |                    |           |
| Delivery to<br>Transfer Station                | 0.035             | 0.023             | 0.017             | 0.014             | 0.010             | 0.007              | 0.003              | 0.002              | 0.002              | N         |
| Pre-treatment<br>WM                            | 0.054             | 0.036             | 0.026             | 0.021             | 0.015             | 0.010              | 0.005              | 0.003              | 0.002              | N         |
| Pre-treatment<br>w/o WM                        | 0.006             | 0.004             | 0.003             | 0.003             | 0.002             | 0.002              | 0.001              | 0.001              | 0.001              | 0.        |
| Fuel Production                                | 0.008             | 0.008             | 0.008             | 0.008             | 0.008             | 0.008              | 0.008              | 0.008              | 0.008              | 0.        |
| Vehicle<br>Operation                           | 0.001             | 0.001             | 0.001             | 0.001             | 0.001             | 0.001              | 0.001              | 0.001              | 0.001              | 0.        |
| Avoided<br>Electricity                         | -0.325            | -0.216            | -0.162            | -0.130            | -0.093            | -0.065             | -0.032             | -0.022             | -0.016             | N         |
| Avoided<br>Natural Gas                         | -0.008            | -0.005            | -0.004            | -0.003            | -0.002            | -0.002             | -0.001             | -0.001             | 0.000              | N         |
| <b>Total</b>                                   | <b>-0.229</b>     | <b>-0.150</b>     | <b>-0.110</b>     | <b>-0.086</b>     | <b>-0.059</b>     | <b>-0.039</b>      | <b>-0.015</b>      | <b>-0.007</b>      | <b>-0.003</b>      | <b>0.</b> |
| <b><i>Percent<br/>Contribution, %</i></b>      |                   |                   |                   |                   |                   |                    |                    |                    |                    |           |
| Delivery to<br>Transfer Station                | -15               | -15               | -16               | -16               | -17               | -18                | -23                | -31                | -52                | N         |
| Pre-Treatment<br>WM                            | -24               | -24               | -24               | -24               | -25               | -26                | -30                | -38                | -57                | N         |
| Pre-Treatment<br>w/o WM                        | -3                | -3                | -3                | -3                | -4                | -4                 | -8                 | -13                | -27                | 76        |
| Fuel Production                                | -4                | -6                | -8                | -10               | -14               | -21                | -55                | -117               | -262               | 24        |
| Vehicle<br>Operation                           | 0                 | -1                | -1                | -1                | -1                | -2                 | -5                 | -11                | -24                | 0         |
| Avoided<br>Electricity                         | 142               | 145               | 147               | 150               | 157               | 167                | 216                | 303                | 510                | N         |
| Avoided<br>Natural Gas                         | 4                 | 4                 | 4                 | 4                 | 4                 | 4                  | 5                  | 8                  | 13                 | N         |
| <b><i>Reduction, %</i></b>                     |                   |                   |                   |                   |                   |                    |                    |                    |                    |           |
| Compared to<br>Soybean                         | -722              | -507              | -399              | -335              | -261              | -205               | -141               | -119               | -109               | 0         |
| Compared to<br>LSD                             | -1118             | -766              | -590              | -484              | -363              | -273               | -167               | -132               | -114               | 64        |

382  
383

384 **Table SI-S27.** Without GTW Waste Management Scenario for Sulfur Oxide Emissions

| <b>Diesel Type</b>                             | <b>GTW<br/>2%</b> | <b>GTW<br/>3%</b> | <b>GTW<br/>4%</b> | <b>GTW<br/>5%</b> | <b>GTW<br/>7%</b> | <b>GTW<br/>10%</b> | <b>GTW<br/>20%</b> | <b>GTW<br/>30%</b> | <b>GTW<br/>40%</b> | <b>Soy-<br/>bean</b> | <b>LSD</b>   |
|------------------------------------------------|-------------------|-------------------|-------------------|-------------------|-------------------|--------------------|--------------------|--------------------|--------------------|----------------------|--------------|
| <b><i>Sulfur Oxides,<br/>g-SOx/MJ-fuel</i></b> |                   |                   |                   |                   |                   |                    |                    |                    |                    |                      |              |
| Pre-treatment                                  | 0.006             | 0.004             | 0.003             | 0.003             | 0.002             | 0.002              | 0.001              | 0.001              | 0.001              | 0.028                | 0.013        |
| Fuel Production                                | 0.008             | 0.008             | 0.008             | 0.008             | 0.008             | 0.008              | 0.008              | 0.008              | 0.008              | 0.009                | 0.009        |
| Vehicle<br>Operation                           | 0.001             | 0.001             | 0.001             | 0.001             | 0.001             | 0.001              | 0.001              | 0.001              | 0.001              | 0.000                | 0.001        |
| <b>Total</b>                                   | <b>0.015</b>      | <b>0.013</b>      | <b>0.012</b>      | <b>0.012</b>      | <b>0.011</b>      | <b>0.011</b>       | <b>0.010</b>       | <b>0.010</b>       | <b>0.010</b>       | <b>0.037</b>         | <b>0.022</b> |
| <b><i>Percent<br/>Contribution, %</i></b>      |                   |                   |                   |                   |                   |                    |                    |                    |                    |                      |              |
| Pre-treatment                                  | 41                | 32                | 27                | 24                | 19                | 16                 | 11                 | 10                 | 9                  | 76                   | 58           |
| Fuel Production                                | 54                | 62                | 67                | 70                | 74                | 77                 | 81                 | 83                 | 84                 | 24                   | 39           |
| Vehicle<br>Operation                           | 5                 | 6                 | 6                 | 6                 | 7                 | 7                  | 8                  | 8                  | 8                  | 0                    | 2            |
| <b><i>Reduction, %<br/>Compared to</i></b>     |                   |                   |                   |                   |                   |                    |                    |                    |                    |                      |              |
| Soybean                                        | -58               | -64               | -66               | -68               | -69               | -71                | -72                | -73                | -73                | 0                    | -39          |
| Compared to<br>LSD                             | -32               | -40               | -44               | -47               | -50               | -52                | -54                | -55                | -56                | 64                   | 0            |

385

386 **Sensitivity of model results to Percent FFA Composition of GTW Lipids**

387 GTW lipid composition is also variable. In this model, the assumed free fatty acid content  
 388 (%FFA) was high which was based off of initial samples of GTW lipids received in the  
 389 laboratory. In the longitudinal study, the average GTW lipid content was approximately  
 390 80%FFA<sup>3</sup>. Therefore, a preliminary analysis was performed to determine the change in GWP<sub>100</sub>.  
 391 GTW lipids composition was assumed to be 80% oleic acid and 20% triolein. The triolein was  
 392 not reacted into biodiesel since the process model does not include transesterification. The  
 393 triolein remains as the residual co-product, “bio-bunker,” in the distillation process. The life  
 394 cycle inventory was updated for this process and GWP<sub>100</sub> was determined. Lipid contents of 5%  
 395 and 30% containing 80%FFA were compared to the consequential LCA approach for 5% and  
 396 30% lipid contents shown in Table SI-S10.



**Table SI-S28.** Comparison of predicted GWP<sub>100</sub> from consequential LCA for low FFA GTW-biodiesel process and high FFA GTW-biodiesel process.

|                   | GWP <sub>100</sub> from Low FFA Scenario |            | GWP <sub>100</sub> from High FFA Scenario |            | Ratio of Low FFA to High FFA |            |
|-------------------|------------------------------------------|------------|-------------------------------------------|------------|------------------------------|------------|
|                   | 5% Lipids                                | 30% Lipids | 5% Lipids                                 | 30% Lipids | 5% Lipids                    | 30% Lipids |
| Pre-Treatment     | 15.2                                     | 2.4        | 12.5                                      | 2.0        | 1.2                          | 1.2        |
| Fuel Production   | 16.5                                     | 16.5       | 14.2                                      | 14.2       | 1.2                          | 1.2        |
| Vehicle Operation | 4.8                                      | 4.8        | 4.8                                       | 4.8        | 1.0                          | 1.0        |
| Total             | 36.4                                     | 23.7       | 31.5                                      | 21.0       | 1.2                          | 1.1        |

The lower FFA does not increase the GWP<sub>100</sub> significantly for either 5% or 30% lipid contents.

The effect of FFA on GWP<sub>100</sub> is similar to the effect of overall lipid content: the lower the FFA, the higher the GWP<sub>100</sub>. The lower FFA is equivalent to having a lower lipid content. For example the 5% lipid content with 80% FFA GWP<sub>100</sub> is the same as 3.5% lipid content with 95% FFA GWP<sub>100</sub>.

#### **Sensitivity to GTW Composition and Monte Carlo Simulation**

The Monte Carlo simulation was performed to determine GWP<sub>100</sub> of both the attributional and consequential LCA approaches for the GTW-biodiesel process. Two lognormal distributions were used based off of raw GTW lipid contents and dewatered GTW lipid contents. The attributional LCA approach included two scenarios based off of landfill gas flaring and co-generation of landfill gas. The consequential LCA approach omits the impacts associated with GTW waste management and the delivery of GTW to the transfer station because they are nearly the same in the current GTW handling process and the proposed GTW-biodiesel process.

#### ***Longitudinal Study***

The longitudinal study occurred between June 2014 and June 2015. A 500 gal tank was located at a transfer station in New Jersey. The GTW hauler deposited interior grease trap collections into the tank. The GTW typically settled into three layers: 1) floating solids with

extractable lipids, 2) wastewater, and 3) sediments. Each layer width was measured and knowing the diameter of the tank, the volume was estimated. The top floating layer was sampled and heated to remove the lipids. The lipid percent was determined as a percent of the total tank volume (lipids from raw GTW) and as a percent of the floating solids layer (lipids from settled GTW float grease or dewatered GTW). The histogram below depicts the frequency of lipid percentages found throughout the longitudinal study.

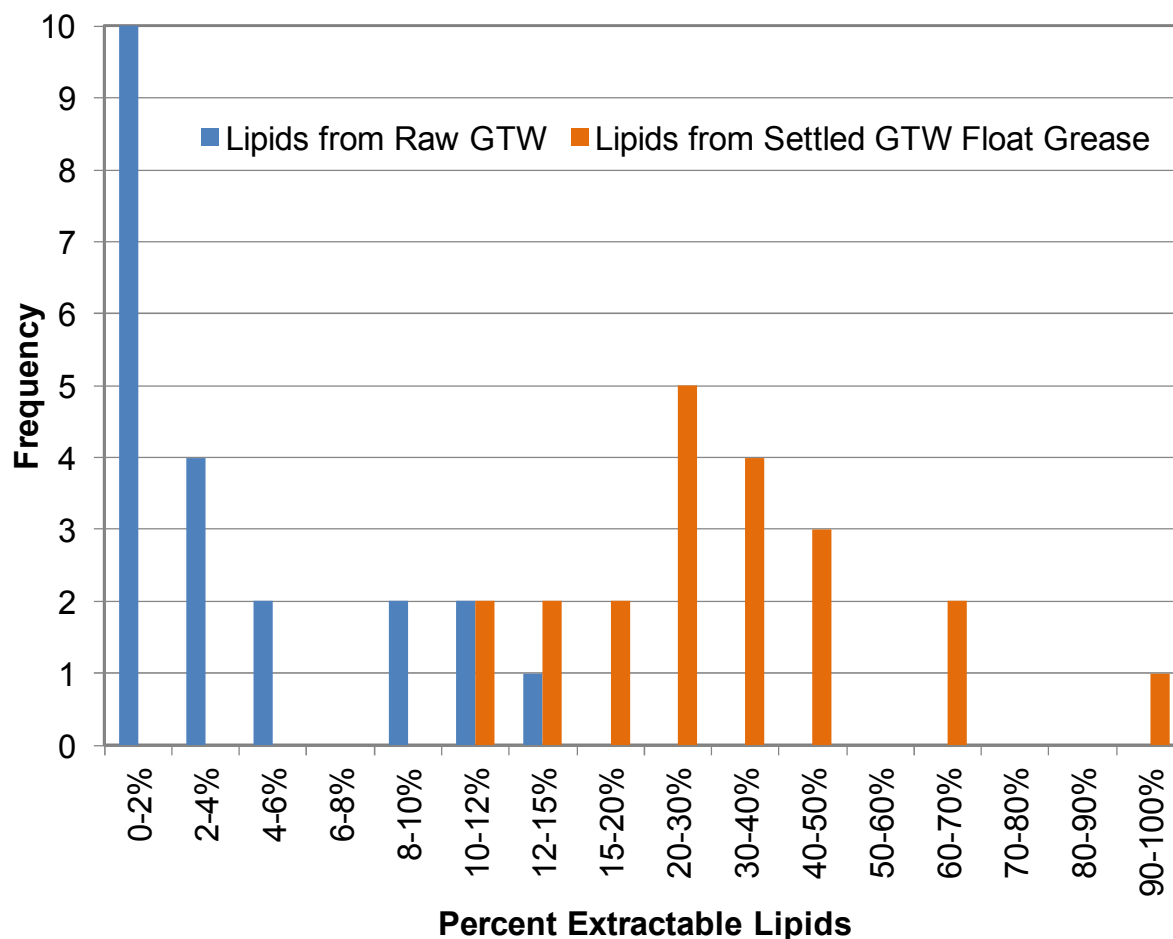

**Figure SI-S10.** Histogram of lipid contents as a percentage of raw GTW (blue) and as a percentage of settled GTW float grease (orange).

The data of each raw GTW lipid content and dewatered was fit to a lognormal distribution using Oracle Crystal Ball. The cumulative distributions for the lipid contents are shown in Figure SI-S11.

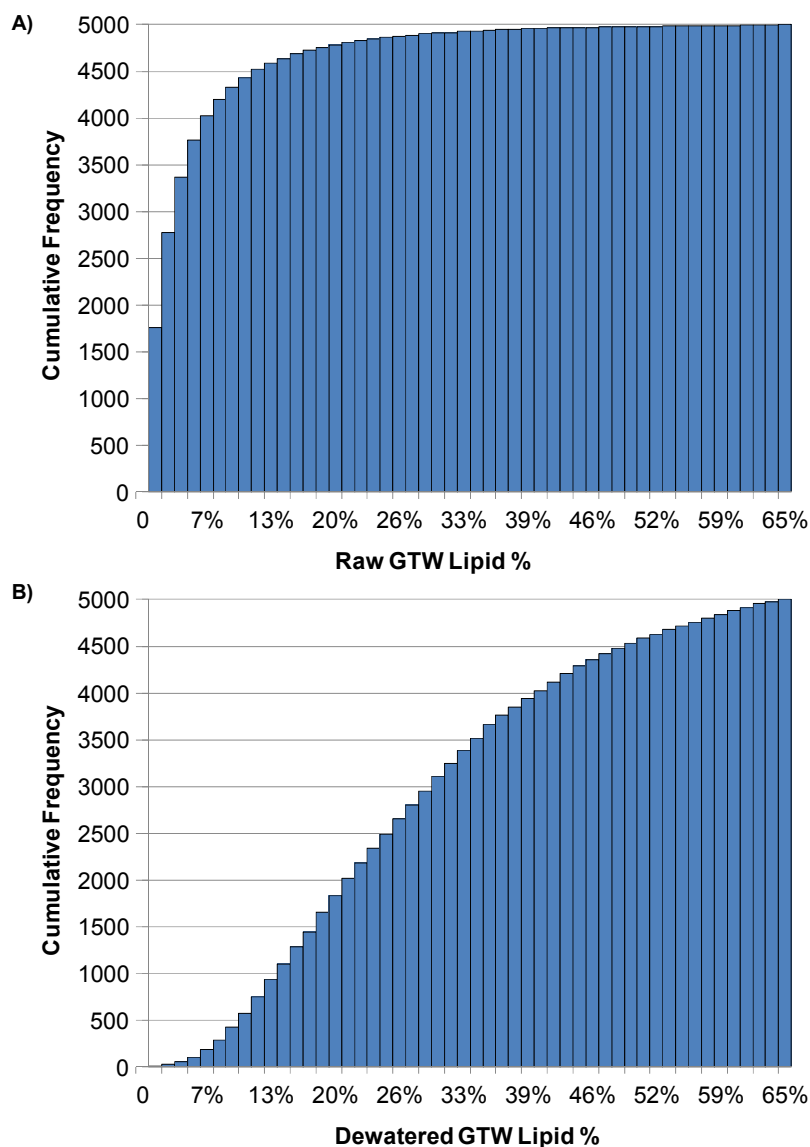

**Figure SI-S11.** Cumulative distributions for lipid content (as a mass fraction) used in the Monte Carlo simulation for A) Raw GTW and B) Dewatered GTW.

The cumulative distribution for the raw GTW has a faster rate than the dewatered GTW as the median is 2% lipids and 27% for raw GTW and dewatered GTW, respectively. 90% confidence for the raw GTW distribution is 11% lipid content; lipid concentrations less than 10% were shown to have larger environmental impacts. This result emphasizes the need for GTW

dewatering since the lipids are concentrated and result in higher lipid contents and therefore lower environmental impacts.

### ***Model Fitting Data***

The environmental impacts were estimated by using the equation derived for the model fitting and using the distribution of the lipid contents. The equation used to determine “Total Eqn SI-S11” was calculated using SI-S11 shown again below:

$$\frac{I_{Total}}{E_{Biodiesel}} = \left( \frac{\hat{I}_{PT}}{\phi \Delta \hat{H}_C} \right) \frac{1}{x} + \left( \frac{\hat{I}_{FP}}{\phi \Delta \hat{H}_C} + \frac{\hat{I}_{VO}}{\Delta \hat{H}_C} \right) \quad (\text{SI-S11})$$

Where,

$\hat{I}_i$  = environmental impact intensity of process stage i per unit mass of input (PT = pre-treatment,

FP = fuel production, and VO = vehicle operation: combustion emissions)

$\Delta \hat{H}_C$  = heat of combustion of biodiesel (lower heating value, MJ/kg)

$\Phi$  = yield of fuel production process

$x$  = lipid content

$E_{Biodiesel}$  = energy content of biodiesel produced

451 **Table SI-S29.** GWP<sub>100</sub> Model Fitting Data

|                   |                                            |       |       |       |       |       |       |      |      |      |
|-------------------|--------------------------------------------|-------|-------|-------|-------|-------|-------|------|------|------|
|                   | x (vol)                                    | 2%    | 3%    | 4%    | 5%    | 7%    | 10%   | 20%  | 30%  | 40%  |
|                   | 1/x (vol)                                  | 50.00 | 33.33 | 25.00 | 20.00 | 14.29 | 10.00 | 5.00 | 3.33 | 2.50 |
|                   | 1/x (mass)                                 | 55.98 | 37.26 | 27.93 | 22.32 | 15.91 | 11.10 | 5.49 | 3.61 | 2.68 |
|                   | kg GTW                                     | 1.44  | 0.96  | 0.72  | 0.57  | 0.41  | 0.29  | 0.14 | 0.09 | 0.07 |
| <b>Flare</b>      | IPT Flare                                  | 207   | 137   | 103   | 82    | 58    | 40    | 20   | 13   | 9    |
|                   | Total                                      | 226   | 156   | 122   | 101   | 77    | 59    | 39   | 32   | 28   |
|                   | Total Eqn SI-S11                           | 226   | 156   | 122   | 101   | 77    | 59    | 39   | 32   | 28   |
|                   | Theoretical Total<br>(slope*1/x+intercept) | 223   | 155   | 121   | 100   | 77    | 59    | 39   | 32   | 29   |
| <b>Co-Gen</b>     | IPT Co-G                                   | 143   | 95    | 71    | 57    | 40    | 28    | 13   | 8    | 6    |
|                   | Total                                      | 162   | 114   | 90    | 76    | 59    | 47    | 32   | 27   | 25   |
|                   | Total Eqn SI-S11                           | 162   | 114   | 90    | 76    | 59    | 47    | 32   | 27   | 25   |
|                   | Theoretical Total<br>(slope*1/x+intercept) | 161   | 113   | 89    | 75    | 59    | 47    | 32   | 28   | 25   |
| <b>W/O<br/>WM</b> | IPT w/o                                    | 31    | 21    | 16    | 13    | 9     | 6     | 3    | 2    | 1    |
|                   | Total                                      | 50    | 40    | 35    | 31    | 28    | 25    | 22   | 21   | 20   |
|                   | Total Eqn SI-S11                           | 50    | 40    | 35    | 31    | 28    | 25    | 22   | 21   | 20   |
|                   | Theoretical Total<br>(slope*1/x+intercept) | 50    | 40    | 34    | 31    | 28    | 25    | 22   | 21   | 20   |

IVO    IFP    phi    density  
 4.79   14.19   1.03   1.11

452

453

454 **Table SI-S30.** Fossil CED Model Fitting Data

|                   |                                            |       |       |       |       |       |       |      |      |      |
|-------------------|--------------------------------------------|-------|-------|-------|-------|-------|-------|------|------|------|
|                   | x (vol)                                    | 2%    | 3%    | 4%    | 5%    | 7%    | 10%   | 20%  | 30%  | 40%  |
|                   | 1/x (vol)                                  | 50.00 | 33.33 | 25.00 | 20.00 | 14.29 | 10.00 | 5.00 | 3.33 | 2.50 |
|                   | 1/x (mass)                                 | 55.98 | 37.26 | 27.93 | 22.32 | 15.91 | 11.10 | 5.49 | 3.61 | 2.68 |
|                   | kg GTW                                     | 1.44  | 0.96  | 0.72  | 0.57  | 0.41  | 0.29  | 0.14 | 0.09 | 0.07 |
| <b>Flare</b>      | IPT Flare                                  | 1.43  | 0.95  | 0.71  | 0.57  | 0.40  | 0.28  | 0.14 | 0.09 | 0.06 |
|                   | Total                                      | 1.72  | 1.24  | 1.00  | 0.85  | 0.69  | 0.56  | 0.42 | 0.37 | 0.35 |
|                   | Total Eqn SI-S11                           | 1.71  | 1.23  | 0.99  | 0.84  | 0.68  | 0.56  | 0.41 | 0.36 | 0.34 |
|                   | Theoretical Total<br>(slope*1/x+intercept) | 1.70  | 1.23  | 0.99  | 0.85  | 0.68  | 0.56  | 0.42 | 0.37 | 0.35 |
| <b>Co-Gen</b>     | IPT Co-G                                   | 0.70  | 0.46  | 0.34  | 0.27  | 0.19  | 0.13  | 0.06 | 0.04 | 0.03 |
|                   | Total                                      | 0.98  | 0.74  | 0.63  | 0.56  | 0.48  | 0.42  | 0.35 | 0.32 | 0.31 |
|                   | Total Eqn SI-S11                           | 0.97  | 0.74  | 0.62  | 0.55  | 0.47  | 0.41  | 0.34 | 0.31 | 0.30 |
|                   | Theoretical Total<br>(slope*1/x+intercept) | 0.97  | 0.74  | 0.62  | 0.55  | 0.48  | 0.42  | 0.35 | 0.32 | 0.31 |
| <b>W/O<br/>WM</b> | IPT w/o                                    | 0.51  | 0.34  | 0.25  | 0.20  | 0.14  | 0.10  | 0.05 | 0.03 | 0.02 |
|                   | Total                                      | 0.79  | 0.62  | 0.54  | 0.48  | 0.43  | 0.38  | 0.33 | 0.32 | 0.31 |
|                   | Total Eqn SI-S11                           | 0.78  | 0.61  | 0.53  | 0.48  | 0.42  | 0.37  | 0.32 | 0.31 | 0.30 |
|                   | Theoretical Total<br>(slope*1/x+intercept) | 0.78  | 0.62  | 0.53  | 0.48  | 0.43  | 0.38  | 0.33 | 0.32 | 0.31 |

IVO IFP phi density  
 GTW  
 0.00 0.28 1.03 1.11

455

456

457 **Table SI-S31.** Carbon Monoxide Model Fitting Data

|               |                                            |       |       |       |       |       |       |       |       |       |
|---------------|--------------------------------------------|-------|-------|-------|-------|-------|-------|-------|-------|-------|
|               | x (vol)                                    | 2%    | 3%    | 4%    | 5%    | 7%    | 10%   | 20%   | 30%   | 40%   |
|               | 1/x (vol)                                  | 50.00 | 33.33 | 25.00 | 20.00 | 14.29 | 10.00 | 5.00  | 3.33  | 2.50  |
|               | 1/x (mass)                                 | 55.98 | 37.26 | 27.93 | 22.32 | 15.91 | 11.10 | 5.49  | 3.61  | 2.68  |
|               | kg GTW                                     | 1.44  | 0.96  | 0.72  | 0.57  | 0.41  | 0.29  | 0.14  | 0.09  | 0.07  |
| <b>Flare</b>  | IPT Flare                                  | 0.131 | 0.087 | 0.065 | 0.052 | 0.037 | 0.026 | 0.013 | 0.008 | 0.006 |
|               | Total                                      | 0.206 | 0.162 | 0.140 | 0.127 | 0.112 | 0.101 | 0.088 | 0.083 | 0.081 |
|               | Total Eqn SI-S11                           | 0.206 | 0.162 | 0.140 | 0.127 | 0.112 | 0.100 | 0.087 | 0.083 | 0.081 |
|               | Theoretical Total<br>(slope*1/x+intercept) | 0.204 | 0.161 | 0.140 | 0.127 | 0.112 | 0.101 | 0.088 | 0.083 | 0.081 |
| <b>Co-Gen</b> | IPT Co-G                                   | 0.128 | 0.445 | 0.333 | 0.266 | 0.190 | 0.132 | 0.065 | 0.043 | 0.032 |
|               | Total                                      | 0.203 | 0.160 | 0.139 | 0.126 | 0.111 | 0.100 | 0.087 | 0.083 | 0.081 |
|               | Total Eqn SI-S11                           | 0.203 | 0.519 | 0.408 | 0.341 | 0.264 | 0.207 | 0.140 | 0.118 | 0.106 |
|               | Theoretical Total<br>(slope*1/x+intercept) | 0.202 | 0.159 | 0.138 | 0.125 | 0.111 | 0.100 | 0.087 | 0.083 | 0.081 |
| <b>W/O WM</b> | IPT w/o                                    | 0.021 | 0.014 | 0.011 | 0.008 | 0.006 | 0.004 | 0.002 | 0.001 | 0.001 |
|               | Total                                      | 0.096 | 0.089 | 0.086 | 0.083 | 0.081 | 0.079 | 0.077 | 0.076 | 0.076 |
|               | Total Eqn SI-S11                           | 0.096 | 0.089 | 0.085 | 0.083 | 0.081 | 0.079 | 0.077 | 0.076 | 0.076 |
|               | Theoretical Total<br>(slope*1/x+intercept) | 0.096 | 0.089 | 0.086 | 0.083 | 0.081 | 0.079 | 0.077 | 0.076 | 0.076 |

density  
 IVO IFP phi GTW  
 0.066 0.0087 1.03 1.11

458

459

460 **Table SI-S32.** Particulate Matter Model Fitting Data

|               | x (vol)                                    | 2%    | 3%    | 4%    | 5%    | 7%    | 10%   | 20%   | 30%   | 40%   |
|---------------|--------------------------------------------|-------|-------|-------|-------|-------|-------|-------|-------|-------|
|               | 1/x (vol)                                  | 50.00 | 33.33 | 25.00 | 20.00 | 14.29 | 10.00 | 5.00  | 3.33  | 2.50  |
|               | 1/x (mass)                                 | 55.98 | 37.26 | 27.93 | 22.32 | 15.91 | 11.10 | 5.49  | 3.61  | 2.68  |
|               | kg GTW                                     | 1.44  | 0.96  | 0.72  | 0.57  | 0.41  | 0.29  | 0.14  | 0.09  | 0.07  |
| <b>Flare</b>  | IPT Flare                                  | 0.03  | 0.02  | 0.02  | 0.01  | 0.01  | 0.01  | 0.00  | 0.00  | 0.00  |
|               | Total                                      | 0.04  | 0.03  | 0.02  | 0.02  | 0.01  | 0.01  | 0.01  | 0.01  | 0.00  |
|               | Total Eqn SI-S11                           | 0.04  | 0.03  | 0.02  | 0.02  | 0.01  | 0.01  | 0.01  | 0.01  | 0.00  |
|               | Theoretical Total<br>(slope*1/x+intercept) | 0.04  | 0.03  | 0.02  | 0.02  | 0.01  | 0.01  | 0.01  | 0.01  | 0.01  |
| <b>Co-Gen</b> | IPT Co-G                                   | 0.01  | 0.41  | 0.30  | 0.24  | 0.17  | 0.12  | 0.06  | 0.04  | 0.03  |
|               | Total                                      | 0.01  | 0.01  | 0.01  | 0.01  | 0.01  | 0.01  | 0.00  | 0.00  | 0.00  |
|               | Total Eqn SI-S11                           | 0.01  | 0.41  | 0.31  | 0.25  | 0.18  | 0.12  | 0.06  | 0.04  | 0.03  |
|               | Theoretical Total<br>(slope*1/x+intercept) | 0.01  | 0.01  | 0.01  | 0.01  | 0.01  | 0.01  | 0.00  | 0.00  | 0.00  |
| <b>W/O WM</b> | IPT w/o                                    | 0.002 | 0.001 | 0.001 | 0.001 | 0.001 | 0.000 | 0.000 | 0.000 | 0.000 |
|               | Total                                      | 0.005 | 0.005 | 0.005 | 0.004 | 0.004 | 0.004 | 0.004 | 0.004 | 0.004 |
|               | Total Eqn SI-S11                           | 0.005 | 0.005 | 0.004 | 0.004 | 0.004 | 0.004 | 0.004 | 0.004 | 0.004 |
|               | Theoretical Total<br>(slope*1/x+intercept) | 0.005 | 0.005 | 0.005 | 0.004 | 0.004 | 0.004 | 0.004 | 0.004 | 0.004 |

IVO    IFP    phi    density  
 0.001   0.002   1.03   GTW  
                                  1.11

461

462



463 Table SI-S33. Mono-Nitrogen Oxides Model Fitting Data

|        | x (vol)                                    | 2%    | 3%    | 4%    | 5%    | 7%    | 10%   | 20%   | 30%   | 40%   |
|--------|--------------------------------------------|-------|-------|-------|-------|-------|-------|-------|-------|-------|
|        | 1/x (vol)                                  | 50.00 | 33.33 | 25.00 | 20.00 | 14.29 | 10.00 | 5.00  | 3.33  | 2.50  |
|        | 1/x (mass)                                 | 55.98 | 37.26 | 27.93 | 22.32 | 15.91 | 11.10 | 5.49  | 3.61  | 2.68  |
|        | kg GTW                                     | 1.44  | 0.96  | 0.72  | 0.57  | 0.41  | 0.29  | 0.14  | 0.09  | 0.07  |
| Flare  | IPT Flare                                  | 0.57  | 0.38  | 0.28  | 0.22  | 0.16  | 0.11  | 0.05  | 0.03  | 0.02  |
|        | Total                                      | 0.62  | 0.43  | 0.34  | 0.28  | 0.22  | 0.17  | 0.11  | 0.09  | 0.08  |
|        | Total Eqn SI-S11                           | 0.62  | 0.43  | 0.34  | 0.28  | 0.22  | 0.17  | 0.11  | 0.09  | 0.08  |
|        | Theoretical Total<br>(slope*1/x+intercept) | 0.62  | 0.43  | 0.34  | 0.28  | 0.22  | 0.17  | 0.11  | 0.09  | 0.08  |
| Co-Gen | IPT Co-G                                   | 0.42  | 0.42  | 0.31  | 0.25  | 0.18  | 0.12  | 0.06  | 0.04  | 0.03  |
|        | Total                                      | 0.48  | 0.34  | 0.27  | 0.22  | 0.18  | 0.14  | 0.10  | 0.08  | 0.07  |
|        | Total Eqn SI-S11                           | 0.48  | 0.48  | 0.37  | 0.31  | 0.24  | 0.18  | 0.12  | 0.09  | 0.08  |
|        | Theoretical Total<br>(slope*1/x+intercept) | 0.47  | 0.33  | 0.26  | 0.22  | 0.17  | 0.14  | 0.10  | 0.08  | 0.08  |
| W/O WM | IPT w/o                                    | 0.033 | 0.022 | 0.017 | 0.013 | 0.009 | 0.007 | 0.003 | 0.002 | 0.002 |
|        | Total                                      | 0.090 | 0.079 | 0.074 | 0.070 | 0.067 | 0.064 | 0.060 | 0.059 | 0.059 |
|        | Total Eqn SI-S11                           | 0.090 | 0.079 | 0.073 | 0.070 | 0.066 | 0.063 | 0.060 | 0.059 | 0.058 |
|        | Theoretical Total<br>(slope*1/x+intercept) | 0.090 | 0.079 | 0.074 | 0.070 | 0.067 | 0.064 | 0.060 | 0.059 | 0.059 |

IVO    IFP    phi    density  
                                  GTW  
 0.04    0.02    1.03    1.11

464

465

466 **Table SI-S34.** Sulfur Oxide Model Fitting Data

|                   |                                            |       |       |       |       |       |       |       |       |       |
|-------------------|--------------------------------------------|-------|-------|-------|-------|-------|-------|-------|-------|-------|
|                   | x (vol)                                    | 2%    | 3%    | 4%    | 5%    | 7%    | 10%   | 20%   | 30%   | 40%   |
|                   | 1/x (vol)                                  | 50.00 | 33.33 | 25.00 | 20.00 | 14.29 | 10.00 | 5.00  | 3.33  | 2.50  |
|                   | 1/x (mass)                                 | 55.98 | 37.26 | 27.93 | 22.32 | 15.91 | 11.10 | 5.49  | 3.61  | 2.68  |
|                   | kg GTW                                     | 1.44  | 0.96  | 0.72  | 0.57  | 0.41  | 0.29  | 0.14  | 0.09  | 0.07  |
| <b>Flare</b>      | IPT Flare                                  | 0.07  | 0.05  | 0.04  | 0.03  | 0.02  | 0.01  | 0.01  | 0.00  | 0.00  |
|                   | Total                                      | 0.08  | 0.06  | 0.05  | 0.04  | 0.03  | 0.02  | 0.02  | 0.01  | 0.01  |
|                   | Total Eqn SI-S11                           | 0.08  | 0.06  | 0.05  | 0.04  | 0.03  | 0.02  | 0.02  | 0.01  | 0.01  |
|                   | Theoretical Total<br>(slope*1/x+intercept) | 0.08  | 0.06  | 0.05  | 0.04  | 0.03  | 0.02  | 0.02  | 0.01  | 0.01  |
| <b>Co-Gen</b>     | IPT Co-G                                   | -0.24 | 0.23  | 0.17  | 0.14  | 0.10  | 0.07  | 0.03  | 0.02  | 0.02  |
|                   | Total                                      | -0.23 | -0.15 | -0.11 | -0.09 | -0.06 | -0.04 | -0.02 | -0.01 | 0.00  |
|                   | Total Eqn SI-S11                           | -0.23 | 0.24  | 0.18  | 0.15  | 0.11  | 0.08  | 0.04  | 0.03  | 0.02  |
|                   | Theoretical Total<br>(slope*1/x+intercept) | -0.23 | -0.15 | -0.11 | -0.09 | -0.06 | -0.04 | -0.02 | -0.01 | 0.00  |
| <b>W/O<br/>WM</b> | IPT w/o                                    | 0.006 | 0.004 | 0.003 | 0.003 | 0.002 | 0.002 | 0.001 | 0.001 | 0.001 |
|                   | Total                                      | 0.015 | 0.013 | 0.012 | 0.012 | 0.011 | 0.011 | 0.010 | 0.010 | 0.010 |
|                   | Total Eqn SI-S11                           | 0.015 | 0.013 | 0.012 | 0.012 | 0.011 | 0.011 | 0.010 | 0.010 | 0.010 |
|                   | Theoretical Total<br>(slope*1/x+intercept) | 0.015 | 0.013 | 0.012 | 0.012 | 0.011 | 0.011 | 0.010 | 0.010 | 0.010 |

density  
IVO IFP phi GTW  
0.001 0.008 1.03 1.11

467

468 The table below shows the slopes and intercepts used in the analysis.

469 **Table SI-S35.** Equation Slope and Intercept for Model Fitting

|                          | <b>Flaring</b> |           | <b>Co-Generation</b> |           | <b>w/o WM</b> |           |
|--------------------------|----------------|-----------|----------------------|-----------|---------------|-----------|
|                          | slope          | intercept | slope                | intercept | slope         | intercept |
| <b>GWP<sub>100</sub></b> | 4.1            | 18        | 2.8                  | 18        | 0.6           | 19        |
| <b>CED</b>               | 0.028          | 0.28      | 0.014                | 0.28      | 0.010         | 0.28      |
| <b>CO</b>                | 0.0026         | 0.075     | 0.0025               | 0.075     | 0.00042       | 0.075012  |
| <b>PM</b>                | 0.00068        | 0.0033    | 0.00018              | 0.0033    | 0.000035      | 0.0036    |
| <b>NO<sub>x</sub></b>    | 0.011          | 0.055     | 0.0084               | 0.054     | 0.00066       | 0.057     |
| <b>SO<sub>x</sub></b>    | 0.0015         | 0.0089    | -0.0047              | 0.0082    | 0.00011       | 0.0097    |

470

471 Where,

472 Slope = (y = Total, x = 1/x)\*density

473 Intercept = (y = Total, x = 1/x)

474 **Monte Carlo Results**

475 The statistical results of the distributions and Monte Carlo trials are summarized in Table SI-  
 476 S12; these results include mean, median, standard deviation, minimum, maximum, 10%  
 477 confidence and 90% confidence. For all data, the percentage of trials that were less than or equal  
 478 to soybean-biodiesel and low sulfur diesel are shown.

479 **Table SI-S36.** Statistical Data from Monte Carlo Simulation Environmental Impacts of GTW-  
 480 Biodiesel

|                                                           | Mean   | Median | Std<br>Dev | Min   | Max     | 10th<br>Percentile | 90th<br>Percentile | <=<br>Soy | <=<br>LSD |
|-----------------------------------------------------------|--------|--------|------------|-------|---------|--------------------|--------------------|-----------|-----------|
| <b>Lognormal<br/>Distribution,<br/>%Lipids</b>            |        |        |            |       |         |                    |                    |           |           |
| Raw GTW                                                   | 5%     | 2%     | 7%         | 0.15% | 64%     | 0%                 | 11%                |           |           |
| Dewatered<br>GTW                                          | 29%    | 27%    | 14%        | 3%    | 65%     | 12%                | 49%                |           |           |
| <b>GWP<sub>100</sub>,<br/>g-CO<sub>2</sub>-eq/MJ-Fuel</b> |        |        |            |       |         |                    |                    |           |           |
| Raw GTW w/<br>Flare                                       | 352.10 | 197.86 | 418.76     | 24.64 | 2719.69 | 54.86              | 851.33             | 0%        | 24%       |
| Raw GTW w/<br>Co-Generation                               | 249.79 | 142.75 | 290.60     | 22.54 | 1892.80 | 43.51              | 596.24             | 1%        | 34%       |
| Raw GTW w/o<br>WM                                         | 69.57  | 46.17  | 63.51      | 19.90 | 428.67  | 24.49              | 145.29             | 12%       | 80%       |
| Dewatered<br>GTW w/ Flare                                 | 37.15  | 33.68  | 11.85      | 24.56 | 156.52  | 26.55              | 51.54              | 2%        | 99%       |
| Dewatered<br>GTW w/ Co-<br>Generation                     | 31.22  | 28.81  | 8.22       | 22.49 | 114.06  | 23.87              | 41.21              | 20%       | 100%      |
| Dewatered<br>GTW w/o WM                                   | 21.80  | 21.27  | 1.80       | 19.89 | 39.90   | 20.19              | 23.98              | 95%       | 100%      |
| <b>Fossil CED,<br/>MJ/MJ-Fuel</b>                         |        |        |            |       |         |                    |                    |           |           |
| Raw GTW w/<br>Flare                                       | 2.59   | 1.52   | 2.90       | 0.32  | 18.99   | 0.53               | 6.05               | 0%        | 41%       |
| Raw GTW w/<br>Co-Generation                               | 1.41   | 0.88   | 1.42       | 0.30  | 9.41    | 0.40               | 3.09               | 0%        | 63%       |

|                                            |      |      |      |      |      |      |      |      |      |
|--------------------------------------------|------|------|------|------|------|------|------|------|------|
| Raw GTW w/o WM                             | 1.10 | 0.72 | 1.02 | 0.30 | 6.88 | 0.37 | 2.32 | 0%   | 73%  |
| Dewatered GTW w/ Flare                     | 0.41 | 0.39 | 0.08 | 0.32 | 1.24 | 0.34 | 0.51 | 0%   | 100% |
| Dewatered GTW w/ Co-Generation             | 0.34 | 0.33 | 0.04 | 0.30 | 0.74 | 0.30 | 0.39 | 0%   | 100% |
| Dewatered GTW w/o WM                       | 0.33 | 0.32 | 0.03 | 0.30 | 0.62 | 0.30 | 0.36 | 0%   | 100% |
| <b>Carbon Monoxide, g-CO/MJ-Fuel</b>       |      |      |      |      |      |      |      |      | 0%   |
| Raw GTW w/ Flare                           | 0.29 | 0.19 | 0.26 | 0.08 | 1.78 | 0.10 | 0.60 | 3%   | 34%  |
| Raw GTW w/ Co-Generation                   | 0.28 | 0.19 | 0.26 | 0.08 | 1.74 | 0.10 | 0.59 | 3%   | 34%  |
| Raw GTW w/o WM                             | 0.11 | 0.09 | 0.04 | 0.08 | 0.35 | 0.08 | 0.16 | 31%  | 86%  |
| Dewatered GTW w/ Flare                     | 0.09 | 0.08 | 0.01 | 0.08 | 0.16 | 0.08 | 0.10 | 54%  | 100% |
| Dewatered GTW w/ Co-Generation             | 0.09 | 0.08 | 0.01 | 0.08 | 0.16 | 0.08 | 0.10 | 55%  | 100% |
| Dewatered GTW w/o WM                       | 0.08 | 0.08 | 0.00 | 0.08 | 0.09 | 0.08 | 0.08 | 100% | 100% |
| <b>Particulate Matter, g-PM/MJ-Fuel</b>    |      |      |      |      |      |      |      |      |      |
| Raw GTW w/ Flare                           | 0.06 | 0.03 | 0.07 | 0.00 | 0.45 | 0.01 | 0.14 | 2%   | 3%   |
| Raw GTW w/ Co-Generation                   | 0.02 | 0.01 | 0.02 | 0.00 | 0.12 | 0.00 | 0.04 | 18%  | 19%  |
| Raw GTW w/o WM                             | 0.01 | 0.01 | 0.00 | 0.00 | 0.03 | 0.00 | 0.01 | 61%  | 64%  |
| Dewatered GTW w/ Flare                     | 0.01 | 0.01 | 0.00 | 0.00 | 0.03 | 0.00 | 0.01 | 47%  | 54%  |
| Dewatered GTW w/ Co-Generation             | 0.00 | 0.00 | 0.00 | 0.00 | 0.01 | 0.00 | 0.00 | 98%  | 99%  |
| Dewatered GTW w/o WM                       | 0.00 | 0.00 | 0.00 | 0.00 | 0.00 | 0.00 | 0.00 | 100% | 100% |
| <b>Mono-Nitrogen Oxides, g-NOx/MJ-Fuel</b> |      |      |      |      |      |      |      |      |      |
| Raw GTW w/ Flare                           | 0.97 | 0.55 | 1.15 | 0.07 | 7.47 | 0.16 | 2.34 | 1%   | 0%   |
| Raw GTW w/ Co-Generation                   | 0.74 | 0.42 | 0.86 | 0.07 | 5.58 | 0.13 | 1.76 | 1%   | 0%   |

|                                                |       |       |      |       |      |       |       |      |      |
|------------------------------------------------|-------|-------|------|-------|------|-------|-------|------|------|
| Raw GTW w/o WM                                 | 0.11  | 0.09  | 0.07 | 0.06  | 0.49 | 0.06  | 0.19  | 42%  | 29%  |
| Dewatered GTW w/ Flare                         | 0.11  | 0.10  | 0.03 | 0.07  | 0.43 | 0.08  | 0.15  | 15%  | 0%   |
| Dewatered GTW w/ Co-Generation                 | 0.09  | 0.09  | 0.02 | 0.07  | 0.34 | 0.07  | 0.12  | 34%  | 11%  |
| Dewatered GTW w/o WM                           | 0.06  | 0.06  | 0.00 | 0.06  | 0.08 | 0.06  | 0.06  | 100% | 100% |
| <b>Sulfur Oxides, g-SO<sub>x</sub>/MJ-Fuel</b> |       |       |      |       |      |       |       |      |      |
| Raw GTW w/ Flare                               | 0.13  | 0.07  | 0.15 | 0.01  | 0.98 | 0.02  | 0.31  | 25%  | 10%  |
| Raw GTW w/ Co-Generation                       | -0.37 | -0.20 | 0.48 | -3.08 | 0.00 | -0.94 | -0.03 | 100% | 100% |
| Raw GTW w/o WM                                 | 0.02  | 0.01  | 0.01 | 0.01  | 0.08 | 0.01  | 0.03  | 93%  | 79%  |
| Dewatered GTW w/ Flare                         | 0.02  | 0.01  | 0.00 | 0.01  | 0.06 | 0.01  | 0.02  | 100% | 93%  |
| Dewatered GTW w/ Co-Generation                 | -0.01 | -0.01 | 0.01 | -0.15 | 0.00 | -0.03 | 0.00  | 100% | 100% |
| Dewatered GTW w/o WM                           | 0.01  | 0.01  | 0.00 | 0.01  | 0.01 | 0.01  | 0.01  | 100% | 100% |

#### *Comparison to LCA for GTW-biodiesel production by Tu and McDonnell<sup>12</sup>*

The GWP<sub>100</sub> and CED<sub>Fossil</sub> data for the comparison below was estimated from Figure 6 and 7 in the Tu and McDonnell paper. The lower heating value of 125.2 MJ/gal<sup>8</sup> was used to convert the Tu and McDonnell data to a MJ of fuel basis. The system boundaries between the analyses are similar; however, this work (Hums et al) contains the combustion of the fuel in a vehicle. The without anaerobic digestion scenario includes the transportation of waste solids to a landfill; however the analysis does not include the landfill gas emissions.

490 **Table SI-S37.** Comparison of LCA results for biodiesel produced from GTW

| Author       | Waste Scenario                   | GWP <sub>100</sub> |    |      | CED <sub>Fossil</sub> |      |       |
|--------------|----------------------------------|--------------------|----|------|-----------------------|------|-------|
|              |                                  | avg                | 5% | 95%  | avg                   | 5%   | 95%   |
| Tu/McDonnell | w/Anaerobic Digestion            | 12                 | 12 | 20   | 0.34                  | 0.30 | 4.39  |
| Tu/McDonnell | w/o Anaerobic Digestion          | 40                 | 20 | 987  | 0.60                  | 0.36 | 13.58 |
| Hums et al   | Raw GTW: Landfill Flare          | 352                | 42 | 1255 | 2.59                  | 0.44 | 8.85  |
| Hums et al   | Raw GTW: Landfill Co-gen         | 250                | 34 | 877  | 1.41                  | 0.36 | 4.46  |
| Hums et al   | Raw GTW: No Waste Treatment      | 37                 | 26 | 59   | 1.10                  | 0.34 | 3.30  |
| Hums et al   | Dewatered GTW: Landfill Flare    | 37                 | 26 | 59   | 0.41                  | 0.33 | 0.56  |
| Hums et al   | Dewatered GTW: Landfill Co-gen   | 31                 | 23 | 47   | 0.34                  | 0.30 | 0.42  |
| Hums et al   | Dewatered GTW No Waste Treatment | 22                 | 20 | 25   | 0.33                  | 0.30 | 0.38  |

# 491 492 493 **SUPPORTING INFORMATION REFERENCES**

- 494 1. Huo, H.; Wang, M.; Bloyd, C.; Putsche, V., Life-Cycle Assessment of Energy and  
495 Greenhouse Gas Effects of Soybean-Derived Biodiesel and Renewable Fuels. In Argonne  
496 National Laboratory: 2008.
- 497 2. Cai, H.; Han, J.; Forman, G.; Divita, V.; Elgowainy, A.; Wang, M., Analysis of  
498 Petroleum Refining Energy Efficiency of U.S. Refineries. In Argonne National Laboratory:  
499 2013.
- 500 3. Cairncross, R. A.; Olson, M. S.; Spatari, S., Extraction of Lipids from Wastewater to  
501 Produce Biofuels: Statistical Variability of Grease Composition and Quantity. In *Unpublished*  
502 *Interim Report for WERF*, Drexel University: Philadelphia, PA, 2015.
- 503 4. *Landfilling*; EPA: 2012; pp 1-22.
- 504 5. Jungbluth, N.; Chudacoff, M.; Dauriat, A.; Dinkel, F.; Doka, G.; Faist Emmenegger, M.;  
505 Gnansounou, E.; Kljun, N.; Schleiss, K.; Spielmann, M.; Stettler, C.; Sutter, J. *Life Cycle*  
506 *Inventories of Bioenergy Data v2.0 (2007)*; Swiss Centre for Life Cycle Inventories: Dübendorf,  
507 CH, 2007.
- 508 6. Eleazer, W. E.; William S. Odle, I.; Wang, Y.-S.; Barlaz, M. A., Biodegradability of  
509 Municipal Solid Waste Components in Laboratory-Scale Landfills. *Environmental Science and*  
510 *Technology* **1997**, 31, (3), 911-917.
- 511 7. *SimaPro 8.0.3.14* PhD; PRé Consultants The Netherlands, 2014.
- 512 8. *Greenhouse Gases, Regulated Emissions, and Energy Use in Transportation Model*,  
513 Argonne National Laboratory: 2014.

- 514 9. Kocsisova, T.; Cvengros, J.; Lutisan, J., High-temperature esterification of fatty acids  
515 with methanol at ambient pressure. *European Journal of Lipid Science and Technology* **2005**,  
516 *107*, (2), 87-92.
- 517 10. Stacy, C. J.; Melick, C. A.; Cairncross, R. A., Esterification of free fatty acids to fatty  
518 acid alkyl esters in a bubble column reactor for use as biodiesel. *Fuel Processing Technology*  
519 **2014**, *124*, (0), 70-77.
- 520 11. Xie, X.; Wang, M.; Han, J., Assessment of fuel-cycle energy use and greenhouse gas  
521 emissions for Fischer-Tropsch diesel from coal and cellulosic biomass. *Environmental science &*  
522 *technology* **2011**, *45*, (7), 3047-53.
- 523 12. Tu, Q.; McDonnell, B. E., Monte Carlo analysis of life cycle energy consumption and  
524 greenhouse gas (GHG) emission for biodiesel production from trap grease. *Journal of Cleaner*  
525 *Production* **2015**.

526
